# Supplementary material for: The enhancement of activity rescues the establishment of Mecp2 null neuronal phenotypes
Source: PubMed Central journal article supplement (PMC8033520; doi:10.15252/emmm.202012433), 2021-03-05

Figure 1 panel B-C

Tuj1-dapi WT DIV 8

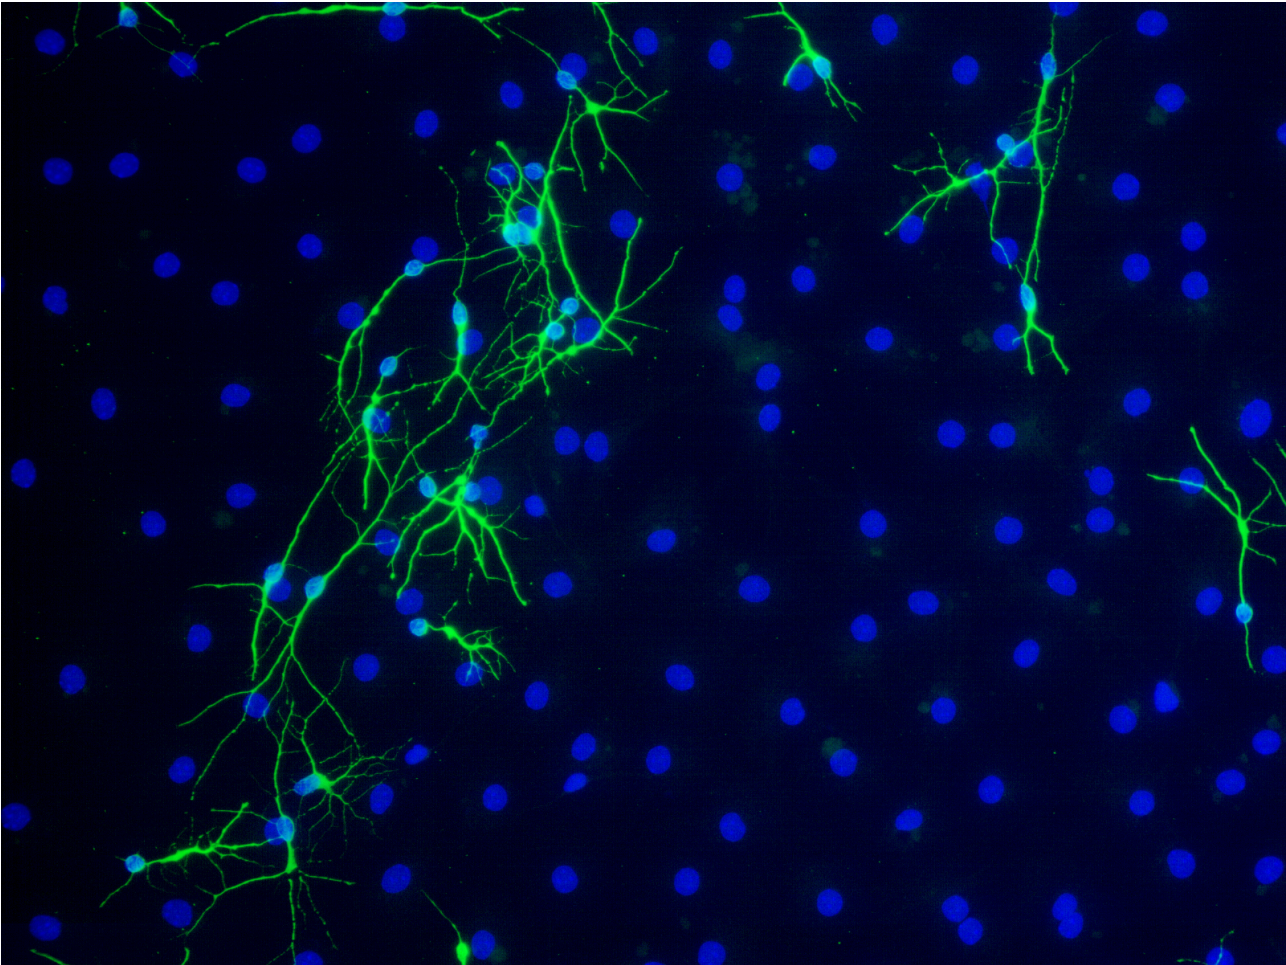

Tuj1-dapi WT DIV 22

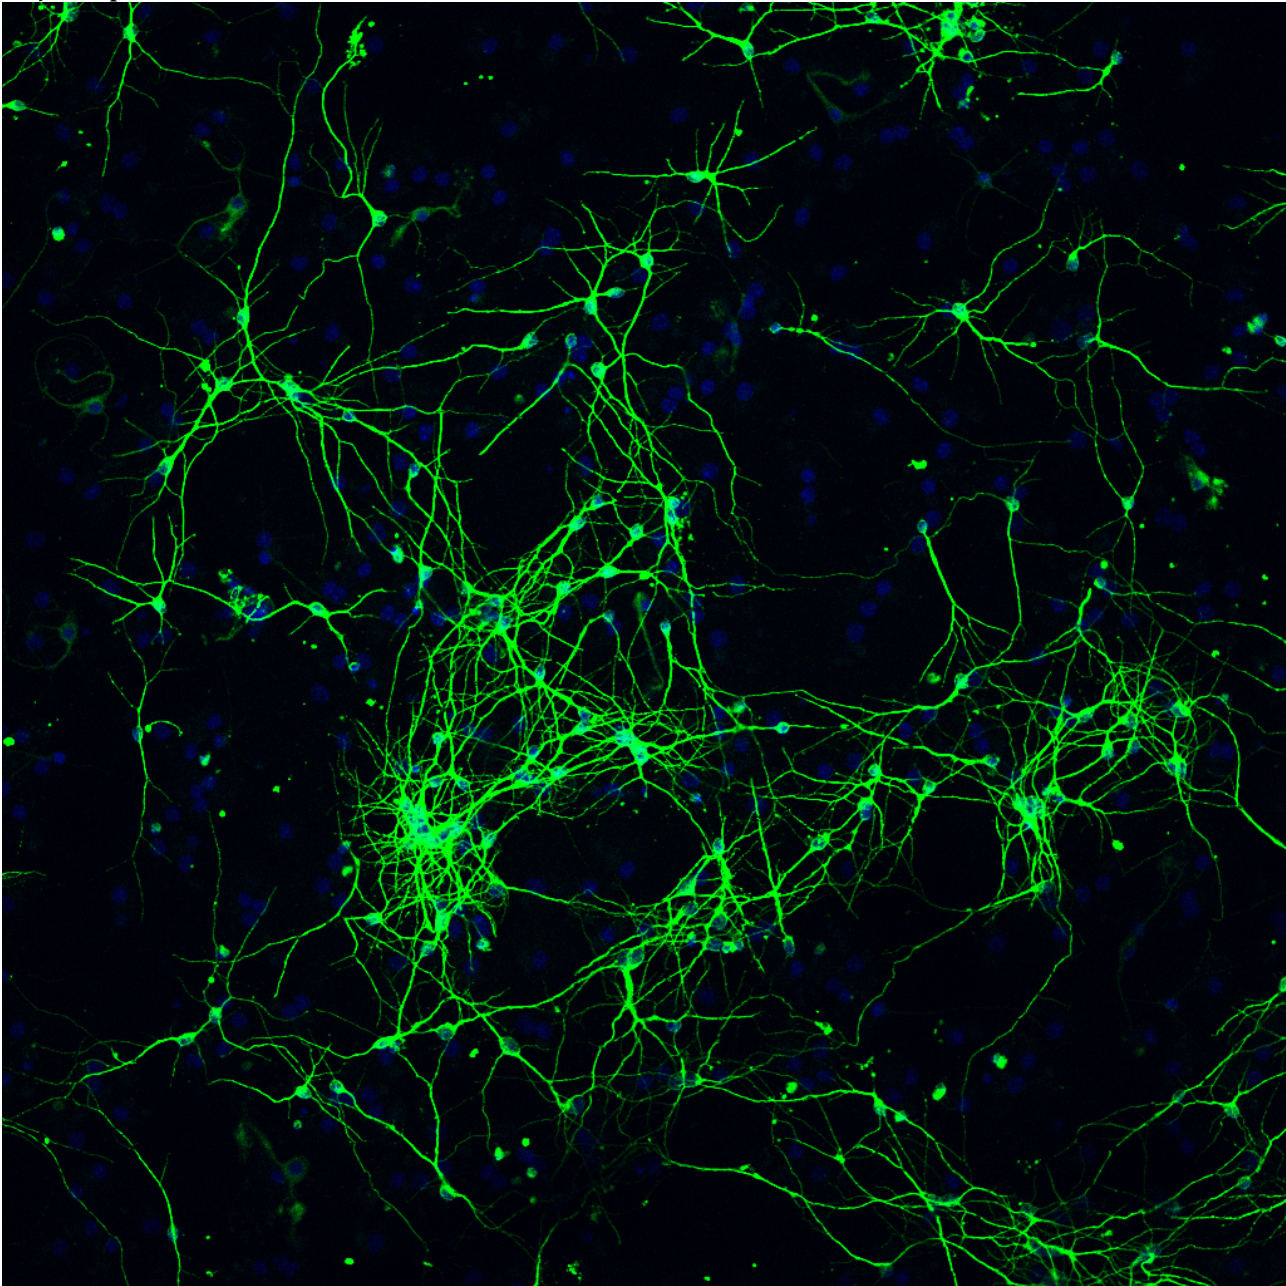

Tuj1-dapi KO DIV8

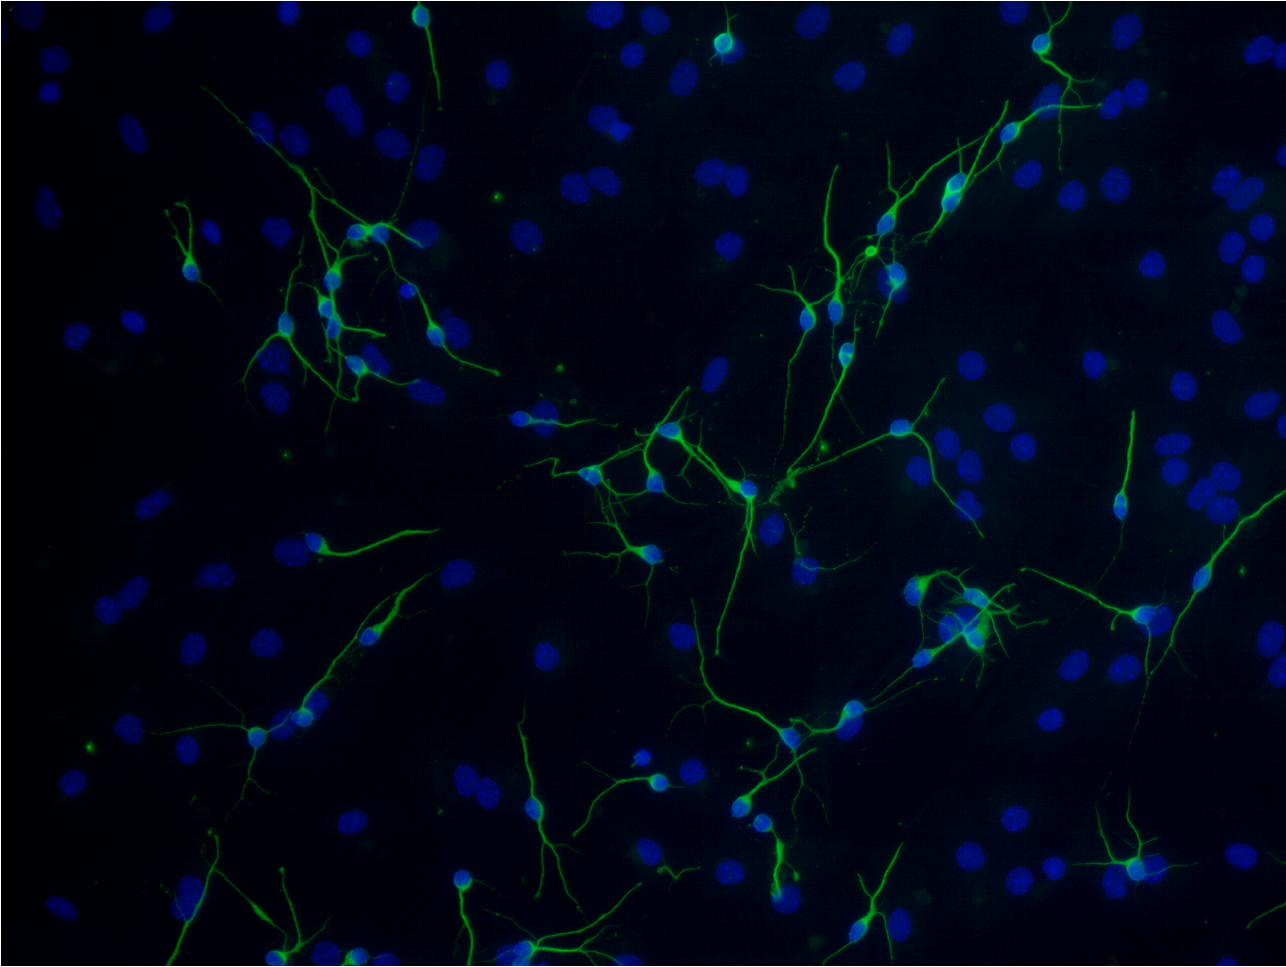

Tuj1-dapi KO DIV22

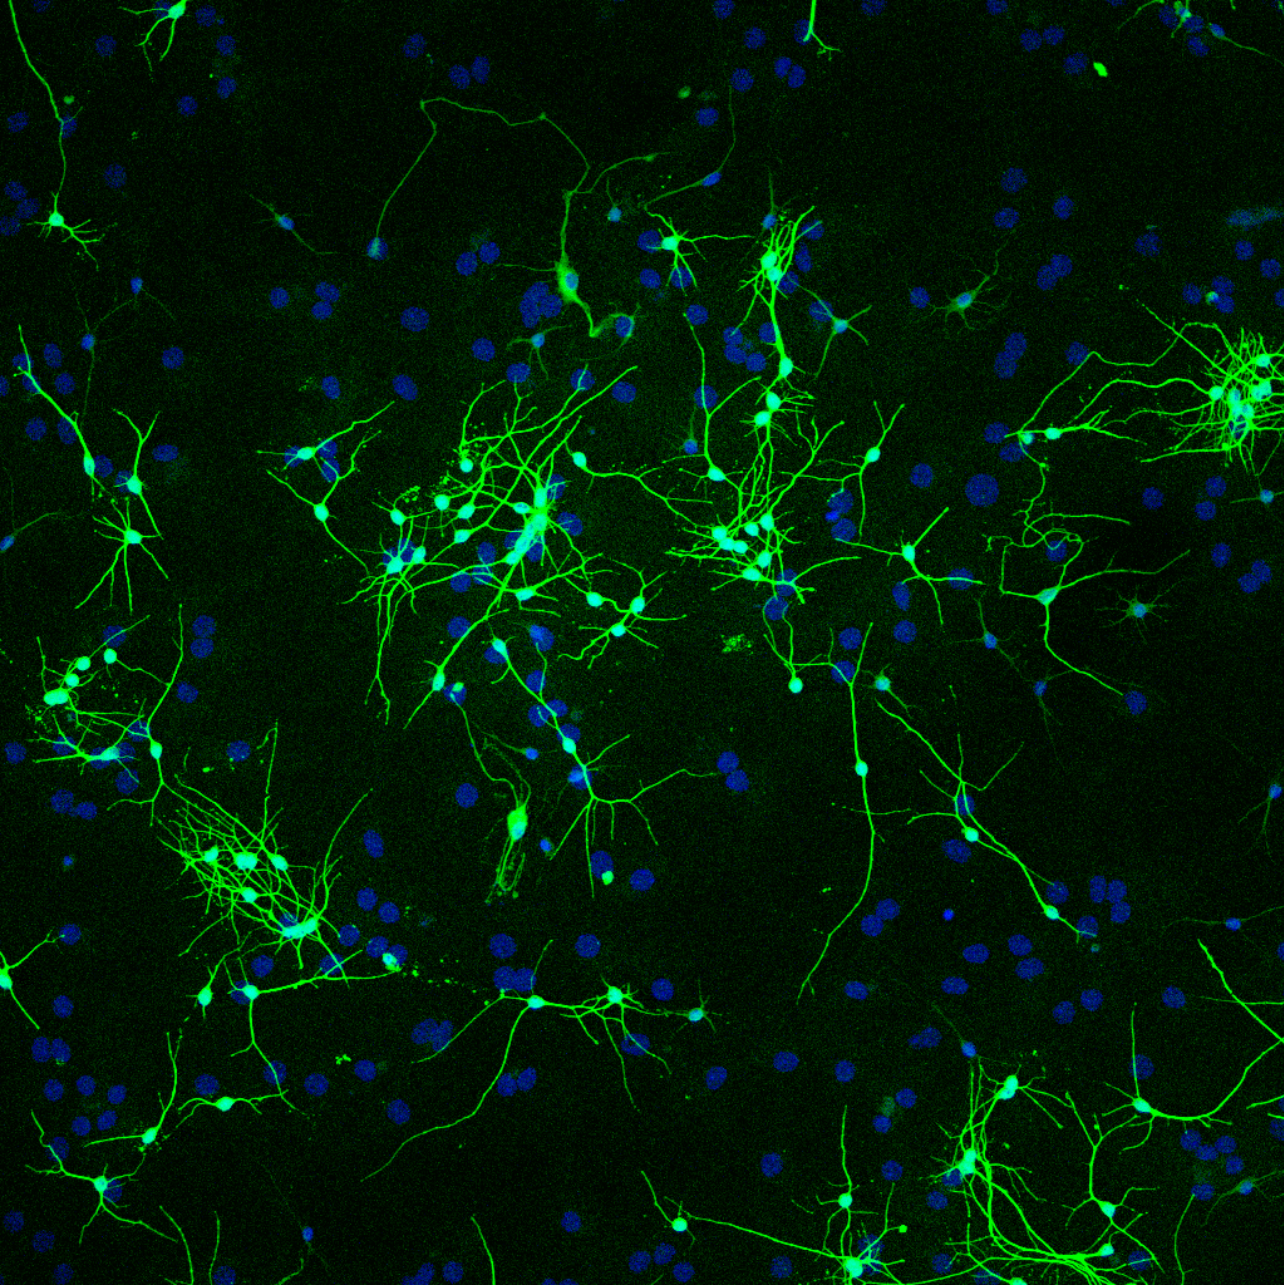

Figure 1 panel E-F

Gfap-dapi WT DIV8

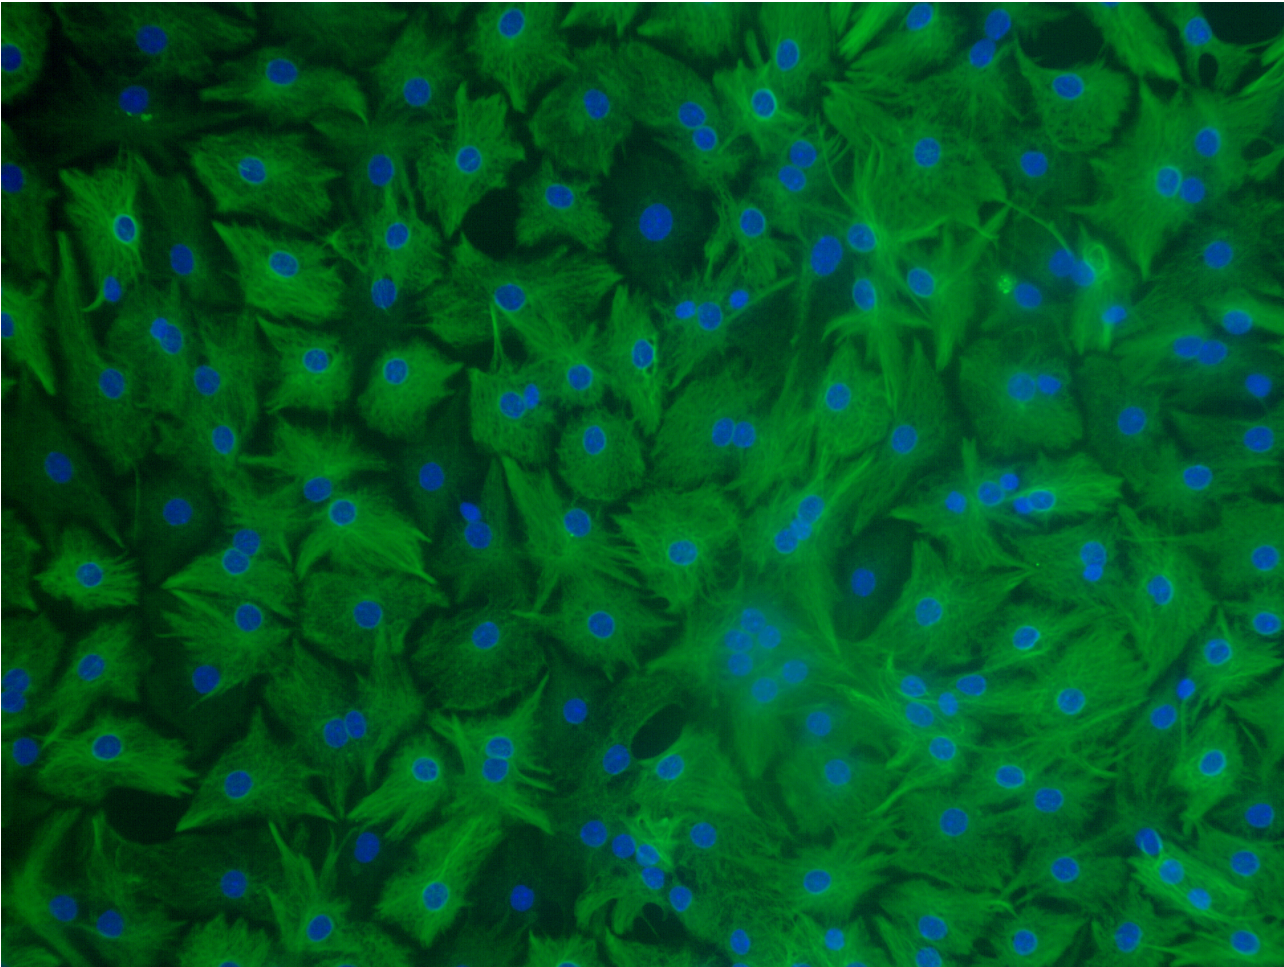

Gfap-dapi WT DIV22

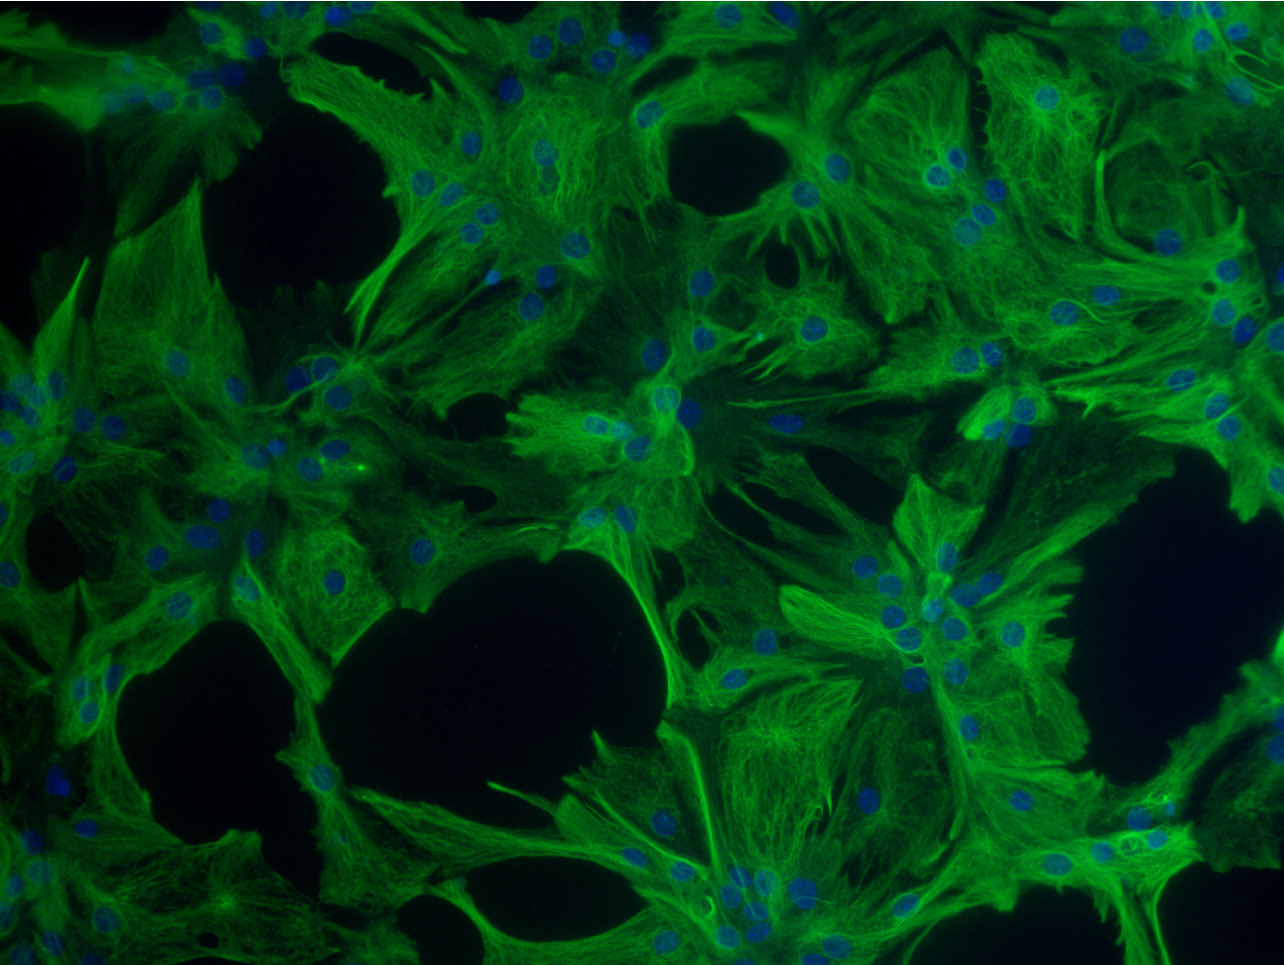

Gfap-dapi KO DIV8

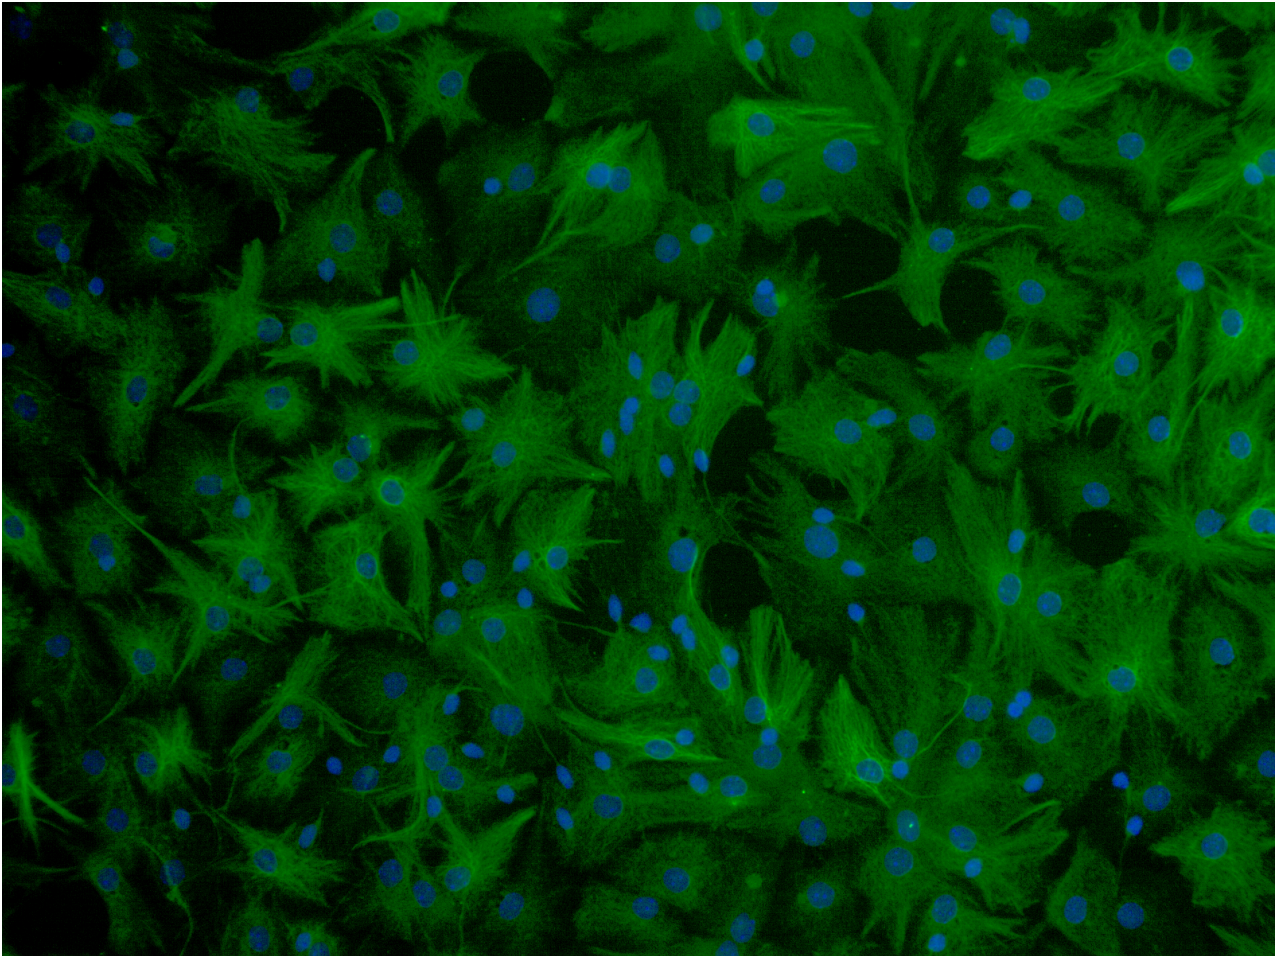

Gfap-dapi DIV22

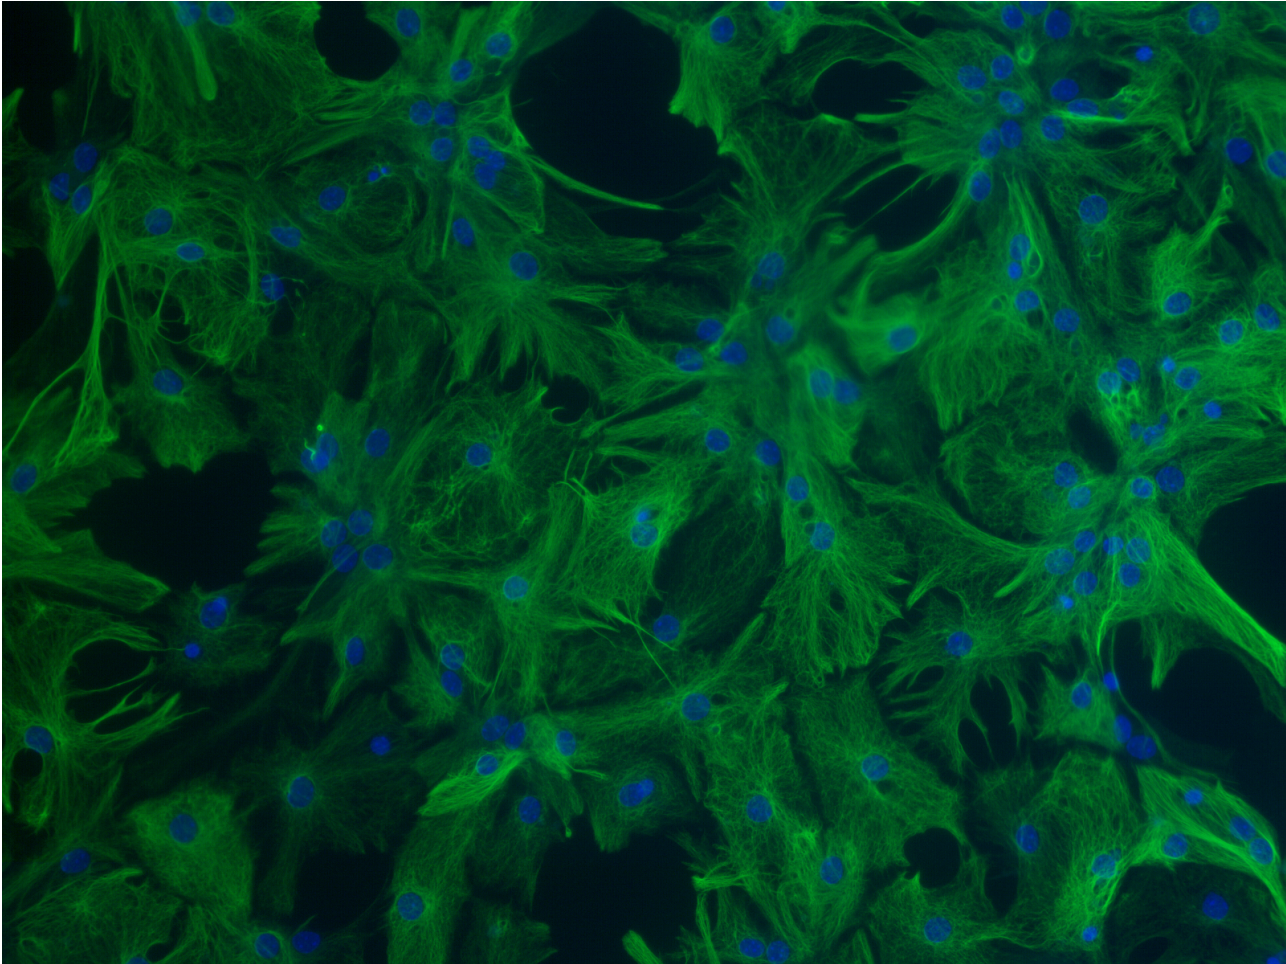



Figure 1 panel H-I

Olig2-dapi WT DIV8

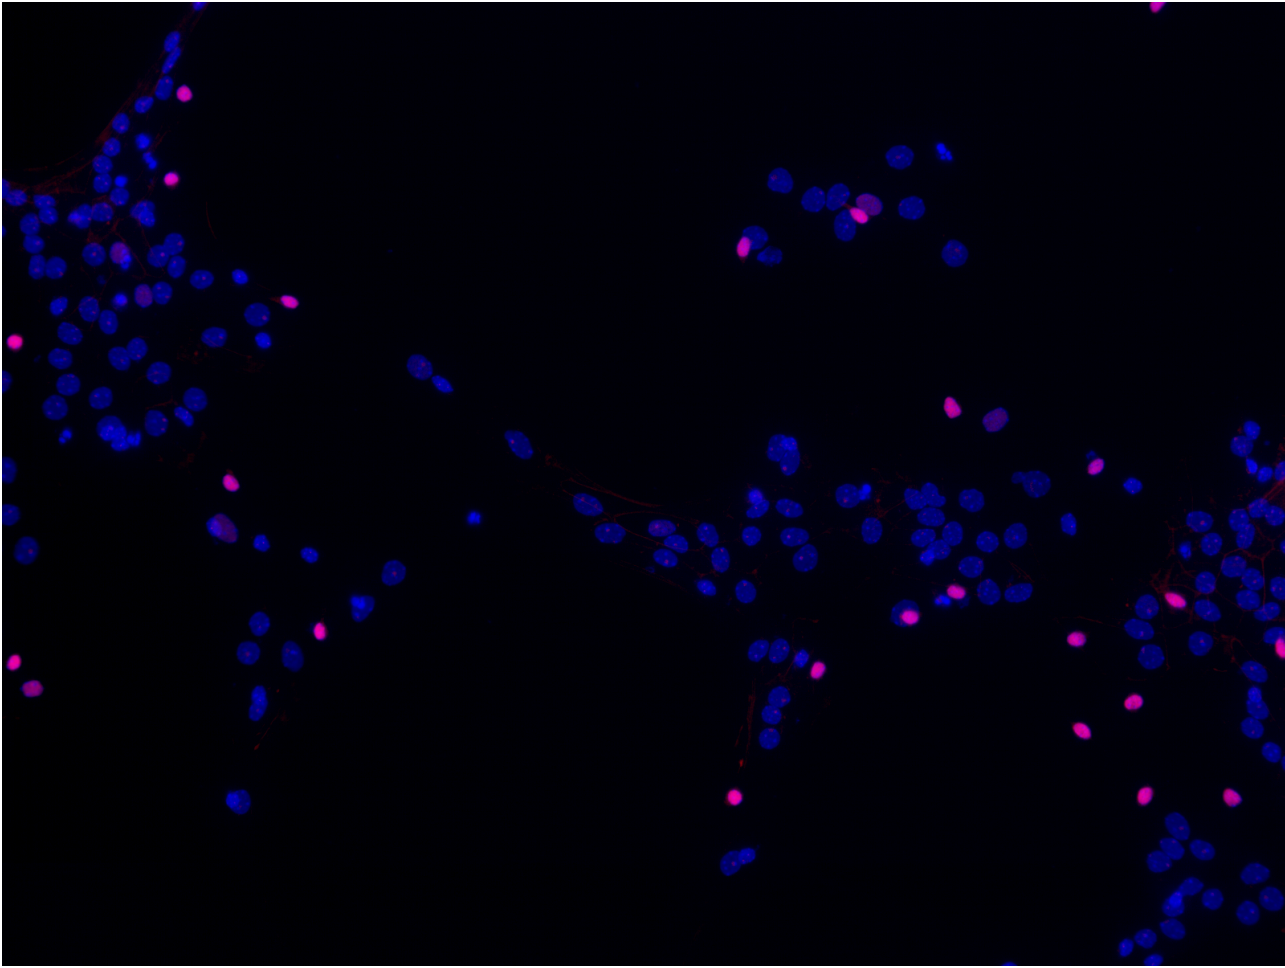

Olig2-dapi WT DIV22

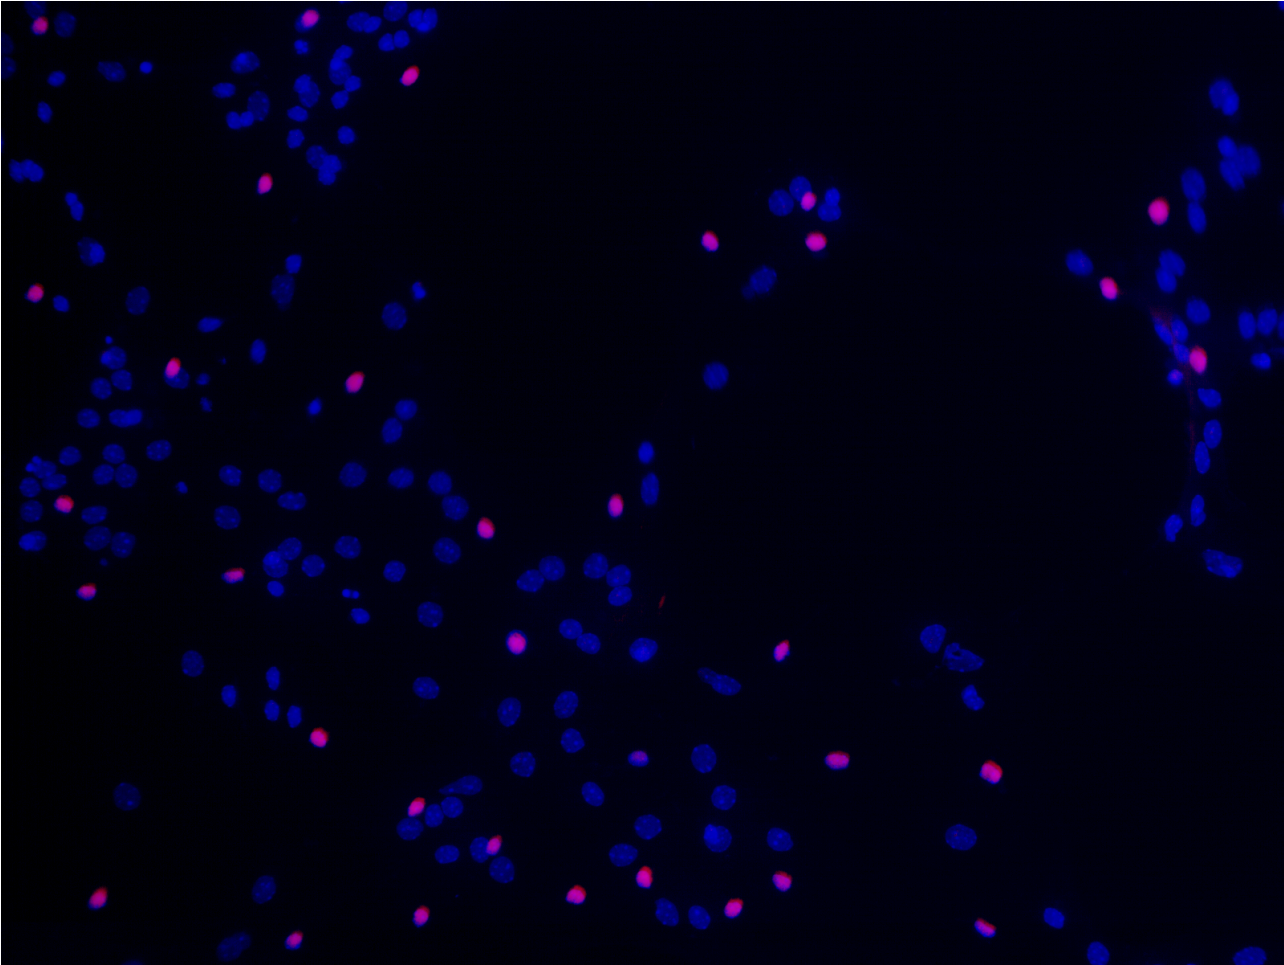

Olig2-dapi KO DIV 8

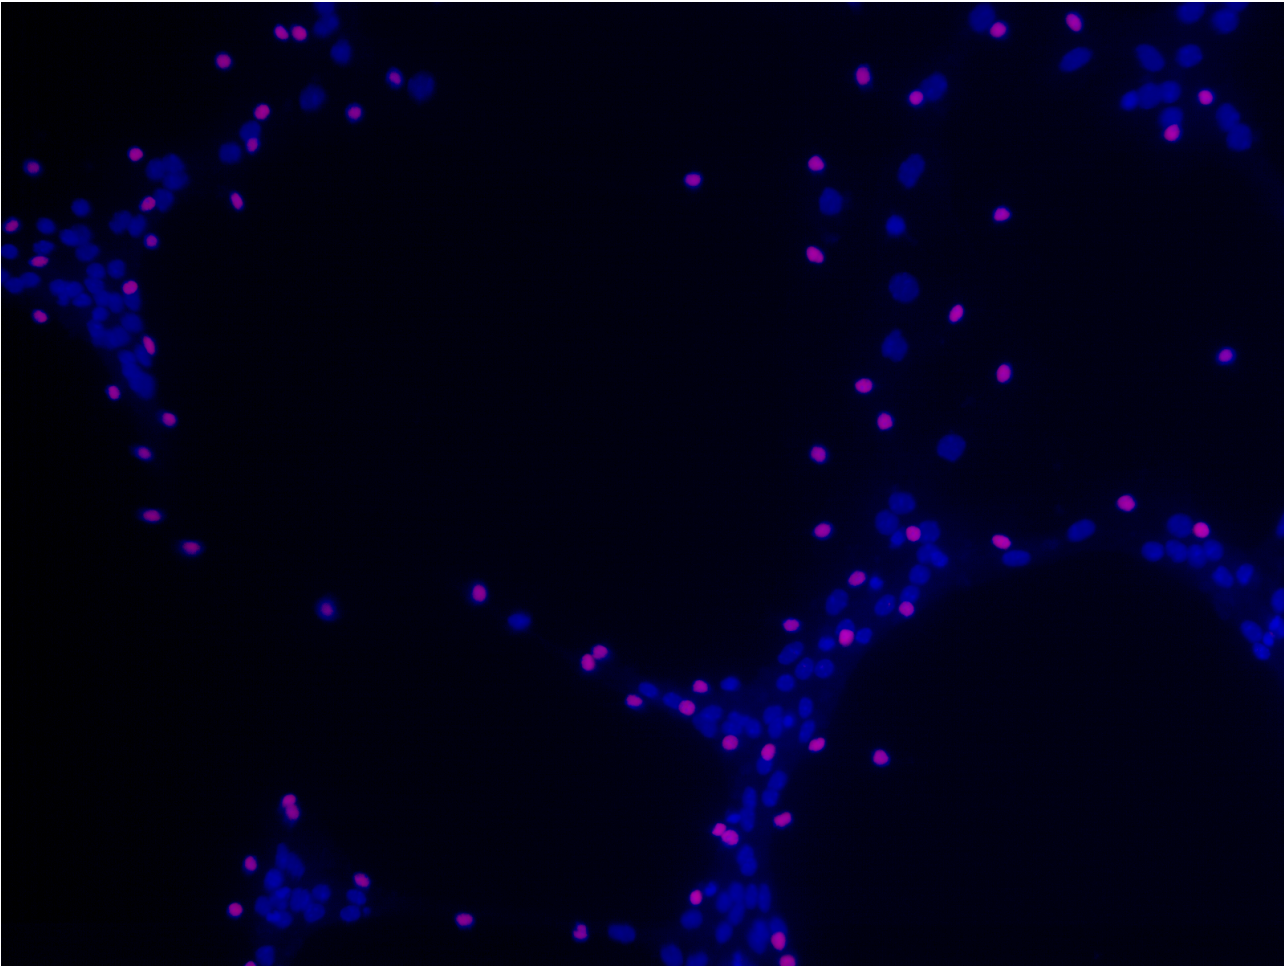

Olig2-dapi KO DIV22

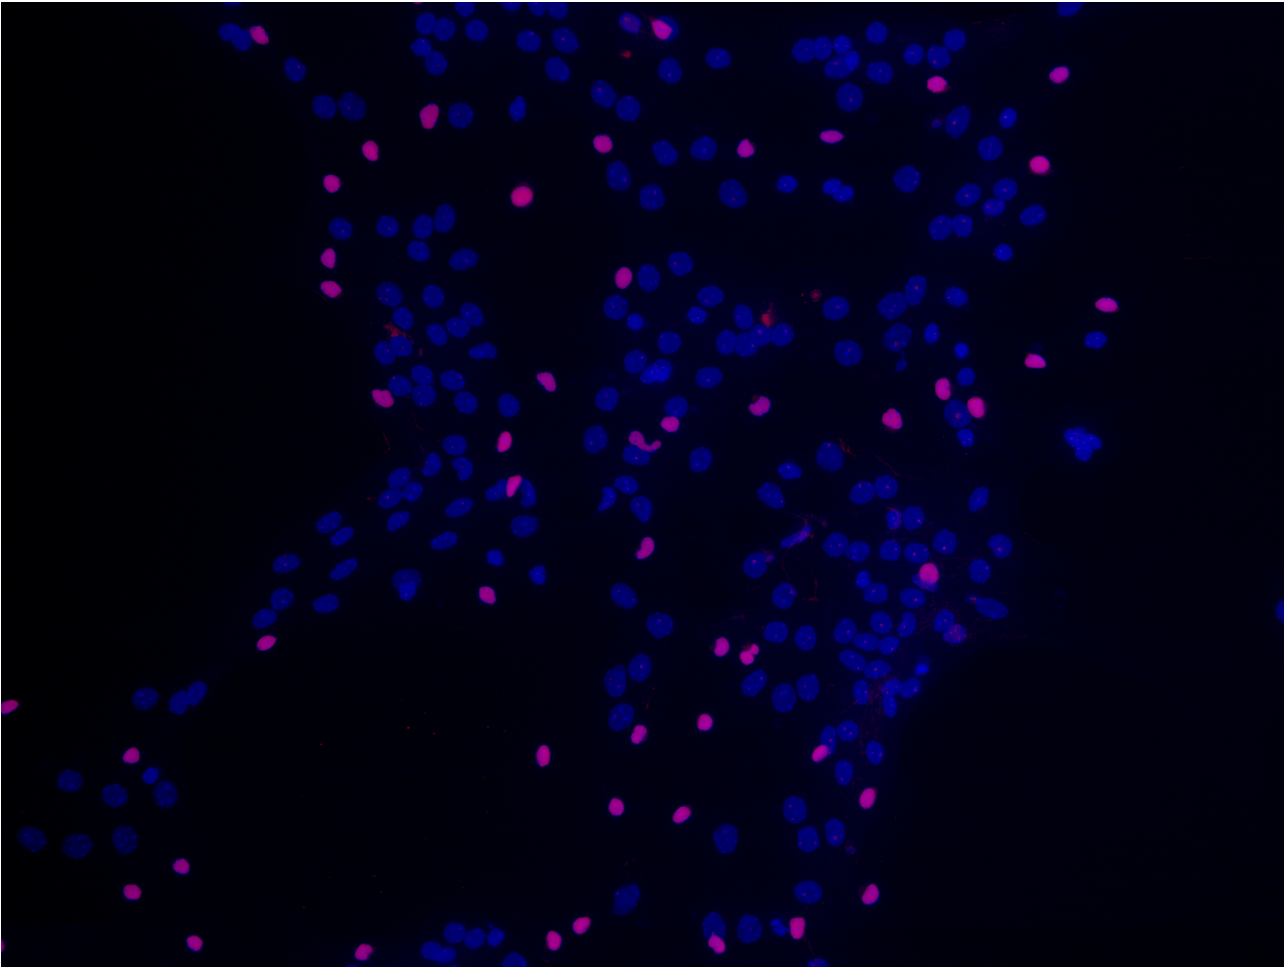

Figure 1 panel K

Tuj1(green)-Neun (red)-dapi WT DIV14

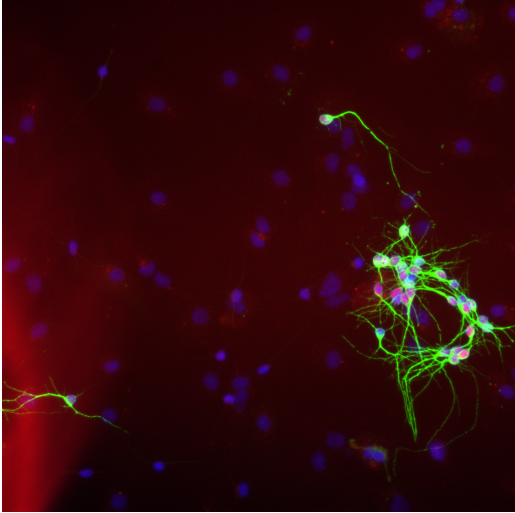

Tuj1(green)-Neun (red)-dapi KO DIV14

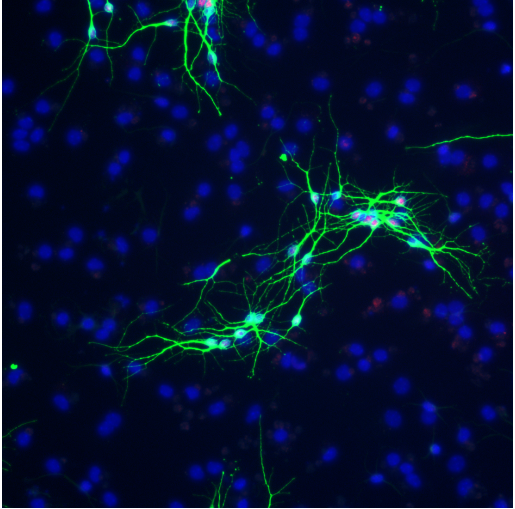

Supplement: EMMM-13-e12433-s004.pdf [file EMMM-13-e12433-s004.pdf]
