# Supplementary material for: The enhancement of activity rescues the establishment of Mecp2 null neuronal phenotypes
Source: PubMed Central journal article supplement (PMC8033520; doi:10.15252/emmm.202012433), 2021-03-05

**Table of content of the *Appendix***

- **Appendix Table S1**
- **Appendix Table S2**
- **Appendix Table S3**
- **Appendix Figure S1**
- **Appendix Figure S2**
- **Appendix Figure S3**

**Appendix Table S1:** TaqMan probes and primers for qRT-PCR classified based on biological functions.

**A**

|                       |                 |                       |              |                          |                         |                  |
|-----------------------|-----------------|-----------------------|--------------|--------------------------|-------------------------|------------------|
| Transcription factors | Neuron specific | Immediate Early Genes | Ion channels | Gluta and Gaba receptors | Intracellular signaling | Neuroprogenitors |
|-----------------------|-----------------|-----------------------|--------------|--------------------------|-------------------------|------------------|

| Gene symbol    | Gene name                                                | Assay ID      |
|----------------|----------------------------------------------------------|---------------|
| <i>Adcy9</i>   | adenylate cyclase 9                                      | Mm00507743_m1 |
| <i>Arc</i>     | activity regulated cytoskeletal-associated protein       | Mm01204954_g1 |
| <i>Arhgdig</i> | Rho GDP dissociation inhibitor (GDI) gamma               | Mm00433576_m1 |
| <i>Bdnf</i>    | brain derived neurotrophic factor                        | Mm04230607_s1 |
| <i>Bhlhb5</i>  | basic helix-loop-helix family, member e22                | Mm00480708_s1 |
| <i>Btg2</i>    | B cell translocation gene 2, anti-proliferative          | Mm00476162_m1 |
| <i>Ca2v1d</i>  | calcium channel, voltage-dependent, L type, alpha 1D     | Mm01209927_g1 |
| <i>Camk2b</i>  | calcium/calmodulin-dependent protein kinase II, beta     | Mm00432284_m1 |
| <i>Camk2d</i>  | calcium/calmodulin-dependent protein kinase II, delta    | Mm00499266_m1 |
| <i>Ccnd1</i>   | cyclin D1                                                | Mm00432359_m1 |
| <i>Clcn3</i>   | chloride channel 3                                       | Mm01348786_m1 |
| <i>Clcn7</i>   | chloride channel 7                                       | Mm00442400_m1 |
| <i>Cux1</i>    | cut-like homeobox 1                                      | Mm01195598_m1 |
| <i>Cux2</i>    | cut-like homeobox 2                                      | Mm00500377_m1 |
| <i>Dcx</i>     | doublecortin                                             | Mm00438400_m1 |
| <i>Dusp1</i>   | dual specificity phosphatase 1                           | Mm00457274_g1 |
| <i>E2f1</i>    | E2F transcription factor 1                               | Mm00432939_m1 |
| <i>Egr1</i>    | early growth response 1                                  | Mm00656724_m1 |
| <i>Fezf2</i>   | fez family zinc finger 2                                 | Mm01320619_m1 |
| <i>Gabbr1</i>  | gamma-aminobutyric acid (GABA) B receptor, 1             | Mm00444578_m1 |
| <i>Gabra3</i>  | gamma-aminobutyric acid (GABA) A receptor, subunit alpha | Mm00433489_m1 |
| <i>Gad67</i>   | glutamate decarboxylase 1                                | Mm04207432_g1 |
| <i>Gap43</i>   | growth associated protein 43                             | Mm00500404_m1 |
| <i>Gnaq</i>    | guanine nucleotide binding protein, alpha q polypeptide  | Mm00492381_m1 |
| <i>Gria1</i>   | glutamate receptor, ionotropic, AMPA1 (alpha 1)          | Mm00433753_m1 |
| <i>Gria2</i>   | glutamate receptor, ionotropic, AMPA2 (alpha 2)          | Mm00442822_m1 |
| <i>Gria3</i>   | glutamate receptor, ionotropic, AMPA3 (alpha 3)          | Mm00497506_m1 |
| <i>Gria4</i>   | glutamate receptor, ionotropic, AMPA4 (alpha 4)          | Mm00444754_m1 |
| <i>Grin1</i>   | glutamate receptor, ionotropic, NMDA1 (zeta 1)           | Mm00433790_m1 |
| <i>Grin2b</i>  | glutamate receptor, ionotropic, NMDA2B (epsilon 2)       | Mm00433820_m1 |
| <i>Grin2c</i>  | glutamate receptor, ionotropic, NMDA2C (epsilon 3)       | Mm00433180_m1 |
| <i>Grin2d</i>  | glutamate receptor, ionotropic, NMDA2D (epsilon 4)       | Mm00433822_m1 |
| <i>Grm3</i>    | glutamate receptor, metabotropic 3                       | Mm00725298_m1 |

| Gene symbol        | Gene name                                                | Assay ID      |
|--------------------|----------------------------------------------------------|---------------|
| <i>Grm5</i>        | glutamate receptor, metabotropic 5                       | Mm00690332_m1 |
| <i>Grm7</i>        | glutamate receptor, metabotropic 7                       | Mm01189424_m1 |
| <i>Hes1</i>        | hairly and enhancer of split 1 (Drosophila)              | Mm01342805_m1 |
| <i>Hes5</i>        | hairly and enhancer of split 5 (Drosophila)              | Mm00439311_g1 |
| <i>Jph1</i>        | junctophilin 1                                           | Mm00517485_m1 |
| <i>Kcc2</i>        | solute carrier family 12, member 5                       | Mm00803929_m1 |
| <i>Kcnq2</i>       | potassium voltage-gated channel, subfamily Q, member 2   | Mm00440080_m1 |
| <i>Kcnq3</i>       | potassium voltage-gated channel, subfamily Q, member 3   | Mm00548884_m1 |
| <i>Ki67</i>        | antigen identified by monoclonal antibody Ki 67          | Mm01278617_m1 |
| <i>Map2</i>        | microtubule-associated protein 2                         | Mm00485231_m1 |
| <i>Nd1</i>         | neurogenic differentiation 1                             | Mm01946604_s1 |
| <i>Necab1</i>      | N-terminal EF-hand calcium binding protein 1             | Mm00724274_m1 |
| <i>Nestin</i>      | nestin                                                   | Mm00450205_m1 |
| <i>Neun</i>        | RNA binding protein, fox-1 homolog 3                     | Hs01370654_m1 |
| <i>Ngn2</i>        | neurogenin 2                                             | Mm00437603_g1 |
| <i>Nkcc1</i>       | solute carrier family 12, member 2                       | Mm01265951_m1 |
| <i>Notch1</i>      | notch 1                                                  | Mm00627185_m1 |
| <i>Notch2</i>      | notch 2                                                  | Mm00803077_m1 |
| <i>Notch3</i>      | notch 3                                                  | Mm01345646_m1 |
| <i>Nr4a1</i>       | nuclear receptor subfamily 4, group A, member 1          | Mm01300401_m1 |
| <i>Nr4a2/nurr1</i> | nuclear receptor subfamily 4; group A; member 2          | Mm00443060_m1 |
| <i>Pax6</i>        | paired box 6                                             | Mm00443081_m1 |
| <i>Plcg2</i>       | phospholipase C, gamma 2                                 | Mm01242530_m1 |
| <i>Ppp1r3c</i>     | protein phosphatase 1, regulatory (inhibitor) subunit 3C | Mm01204084_m1 |
| <i>Psd95</i>       | discs, large homolog 4                                   | Mm00492193_m1 |
| <i>Rest</i>        | RE1-silencing transcription factor                       | Mm00803268_m1 |
| <i>Satb2</i>       | special AT-rich sequence binding protein 2               | Mm00507331_m1 |
| <i>Scn2b</i>       | sodium channel, voltage-gated, type II, beta             | Mm01179204_g1 |
| <i>scn3b</i>       | sodium channel, voltage-gated, type III, beta            | Mm00463369_m1 |
| <i>Scn8a</i>       | sodium channel, voltage-gated, type VIII, alpha          | Mm00488110_m1 |
| <i>Sox2</i>        | SRY (sex determining region Y)-box 2                     | Mm03053810_s1 |
| <i>Syn1</i>        | synapsin I                                               | Mm00449772_m1 |
| <i>Tuj1</i>        | tubulin, beta 3 class III                                | Mm00727586_s1 |

**B**

| Gene                 | Sequences                    |                              |
|----------------------|------------------------------|------------------------------|
| <i>Arc</i>           | FP: GAGCCTACAGACCAGGAG       | RP: TGCCTTGAAGTGCTTGGGA      |
| <i>Bdnf</i> (exon 9) | FP: AAGTCTGCATTACCTCTCGA     | RP: GTTTTCTGAAAGAGGACAGTTT   |
| <i>cFos</i>          | FP: AGAGCGCCCATCCTTAC        | RP: GCAGCCATCTTATCCGGTC      |
| <i>Gabrg2</i>        | FP: GCAACCGGAAACCAAGCAAGGATA | RP: GGTGGGTGGCATTGTTCAATTGGA |
| <i>Gria2</i>         | FP: GCGAGGCGAAACGAATGA       | RP: CACTCTCGATGCCATATACGTTG  |
| <i>Gria3</i>         | FP: ACCATCAGCATAGGTGGACTT    | RP: ACGTGGTAGTTCAAATGGAAGG   |

| Gene          | Sequences                  |                             |
|---------------|----------------------------|-----------------------------|
| <i>Grin1</i>  | FP: AGAGCCCACCCTAAAAGAA    | RP: CCCTCCTCCTCTCAATAGC     |
| <i>Grin2a</i> | FP: ACGTGACAGAACGGAACCTT   | RP: TCAGTGGGGTTCATCAATAACG  |
| <i>Grin2b</i> | FP: GCCATGAACGAGACTGACCC   | RP: GCTTCCTGGTCCGTGTCTATC   |
| <i>Kcc2</i>   | FP: GCGGGATGCCAGAAAGTCTA   | RP: GATGCAAGGCTCCAAACAGAACA |
| <i>Map2</i>   | FP: CTGGACATCAGCCTCACTCA   | RP: AATAGGTGCCCTGTGACCTG    |
| <i>Neun</i>   | FP: ATCGTAGAGGGACGGAAATTGA | RP: GTTCCAGGCTCTTATTGGTC    |

**Appendix Table S2:** List of antibodies and dilutions.

|               | <b>dilution</b> | <b>manufacturer</b> | <b>code</b> |
|---------------|-----------------|---------------------|-------------|
| <b>Gfap</b>   | 1 : 500         | Cell Signaling      | GA5         |
| <b>Map2</b>   | 1 : 500         | Cell Signaling      | D5G1        |
| <b>Mecp2</b>  | 1 : 500         | Cell Signaling      | D4F3        |
| <b>Nestin</b> | 1 : 250         | Millipore           | MAB353      |
| <b>Neun</b>   | 1 : 500         | Cell Signaling      | D3S3I       |
| <b>Olig2</b>  | 1 : 500         | AbCam               | AB42453     |
| <b>Tuj1</b>   | 1 : 1000        | Sigma Aldrich       | T8578       |

**Appendix Table S3:** Exact P-value and the statistical test used for each comparison are indicated for each figure.

| <b>Figure 1</b> | <b>P value</b> | <b>Comparison</b>     | <b>Statistical test</b>                                           |
|-----------------|----------------|-----------------------|-------------------------------------------------------------------|
| 1D              | 0,566          | WT vs KO Div8         | Two-way ANOVA and Bonferroni post hoc test                        |
|                 | 0,546          | WT vs KO Div22        | Two-way ANOVA and Bonferroni post hoc test                        |
| 1G              | >0,999         | WT vs KO Div8         | Two-way ANOVA and Bonferroni post hoc test                        |
|                 | >0,999         | WT vs KO Div22        | Two-way ANOVA and Bonferroni post hoc test                        |
| 1J              | >0,999         | WT vs KO Div8         | Two-way ANOVA and Bonferroni post hoc test                        |
|                 | >0,140         | WT vs KO Div22        | Two-way ANOVA and Bonferroni post hoc test                        |
| 1L              | 0,95           | WT vs KO Tuj1         | Multiple t-test and Holm-Sidak correction for multiple comparison |
|                 | 0,14           | WT vs KO Neun         | Multiple t-test and Holm-Sidak correction for multiple comparison |
| 1M              | 0,001          | WT vs KO Avg INT NeuN | Student's t-test                                                  |
| 1n'             | 0,001          | WT vs KO Avg INT NeuN | Kolmogorov Smirnov test                                           |
| 1O              | >0,999         | WT vs KO Div0         | Two-way ANOVA and Bonferroni post hoc test                        |
|                 | >0,999         | WT vs KO Div3         | Two-way ANOVA and Bonferroni post hoc test                        |

|                 |                |                        |                                                            |
|-----------------|----------------|------------------------|------------------------------------------------------------|
|                 | <0,0001        | WT vs KO Div14         | Two-way ANOVA and Bonferroni post hoc test                 |
| 1P              | <0,0001        | WT vs KO Div3 Neurod1  | Two-way ANOVA and Sidak correction for multiple comparison |
|                 | 0,6763         | WT vs KO Div14 Neurod1 | Two-way ANOVA and Sidak correction for multiple comparison |
|                 | 0,9825         | WT vs KO Div3 Arc      | Two-way ANOVA and Sidak correction for multiple comparison |
|                 | 0,0729         | WT vs KO Div14 Arc     | Two-way ANOVA and Sidak correction for multiple comparison |
|                 | 0,9590         | WT vs KO Div3 Gria1    | Two-way ANOVA and Sidak correction for multiple comparison |
|                 | <0,0016        | WT vs KO Div14 Gria1   | Two-way ANOVA and Sidak correction for multiple comparison |
|                 | 0,8943         | WT vs KO Div3 Grin1    | Two-way ANOVA and Sidak correction for multiple comparison |
|                 | <0,0041        | WT vs KO Div14 Grin1   | Two-way ANOVA and Sidak correction for multiple comparison |
|                 | 0,9788         | WT vs KO Div3 Grin2b   | Two-way ANOVA and Sidak correction for multiple comparison |
|                 | <0,0001        | WT vs KO Div14 Grin2b  | Two-way ANOVA and Sidak correction for multiple comparison |
|                 | 0,9953         | WT vs KO Div3 Kcc2     | Two-way ANOVA and Sidak correction for multiple comparison |
|                 | <0,0001        | WT vs KO Div14 Kcc2    | Two-way ANOVA and Sidak correction for multiple comparison |
|                 | 0,9078         | WT vs KO Div3 Gabra3   | Two-way ANOVA and Sidak correction for multiple comparison |
|                 | 0,0434         | WT vs KO Div14 Gabra3  | Two-way ANOVA and Sidak correction for multiple comparison |
|                 | 0,7188         | WT vs KO Div3 Psd95    | Two-way ANOVA and Sidak correction for multiple comparison |
|                 | <0,0001        | WT vs KO Div14 Psd95   | Two-way ANOVA and Sidak correction for multiple comparison |
|                 | 0,7223         | WT vs KO Div3 Scn2b    | Two-way ANOVA and Sidak correction for multiple comparison |
|                 | 0,0226         | WT vs KO Div14 Scn2b   | Two-way ANOVA and Sidak correction for multiple comparison |
|                 | 0,6977         | WT vs KO Div3 Syn1     | Two-way ANOVA and Sidak correction for multiple comparison |
|                 | 0,0002         | WT vs KO Div14 Syn1    | Two-way ANOVA and Sidak correction for multiple comparison |
| <b>Figure 2</b> | <b>P value</b> | <b>Comparison</b>      | <b>Statistical test</b>                                    |
| 2C              | 0,0700         | WT vs KO Div18         | Two-way ANOVA and Bonferroni post hoc test                 |
|                 | 0,0096         | WT vs KO Div22         | Two-way ANOVA and Bonferroni post hoc test                 |

|    |         |                                 |                                            |
|----|---------|---------------------------------|--------------------------------------------|
|    | 0,2000  | WT Div18 vs WT Div22 (in time)  | Two-way ANOVA and Bonferroni post hoc test |
|    | >0,999  | KO Div18 vs KO Div 22 (in time) | Two-way ANOVA and Bonferroni post hoc test |
| 2D | 0, 2862 | WT vs KO Div18                  | Two-way ANOVA and Bonferroni post hoc test |
|    | 0,0002  | WT vs KO Div22                  | Two-way ANOVA and Bonferroni post hoc test |
|    | 0,0013  | WT Div18 vs WT Div22 (in time)  | Two-way ANOVA and Bonferroni post hoc test |
|    | >0,999  | KO Div18 vs KO Div 22 (in time) | Two-way ANOVA and Bonferroni post hoc test |
| 2E | 0,2000  | WT vs KO Div18                  | Two-way ANOVA and Bonferroni post hoc test |
|    | 0,0100  | WT vs KO Div22                  | Two-way ANOVA and Bonferroni post hoc test |
|    | 0,0500  | WT Div18 vs WT Div22 (in time)  | Two-way ANOVA and Bonferroni post hoc test |
|    | >0,999  | KO Div18 vs KO Div 22 (in time) | Two-way ANOVA and Bonferroni post hoc test |
| 2F | >0,999  | WT vs KO Div18                  | Two-way ANOVA and Bonferroni post hoc test |
|    | 0,9331  | WT vs KO Div22                  | Two-way ANOVA and Bonferroni post hoc test |
|    | 0,046   | WT Div18 vs WT Div22 (in time)  | Two-way ANOVA and Bonferroni post hoc test |
|    | 0,0777  | KO Div18 vs KO Div 22 (in time) | Two-way ANOVA and Bonferroni post hoc test |
| 2G | 0,2120  | WT vs KO Div18                  | Two-way ANOVA and Bonferroni post hoc test |
|    | 0,3691  | WT vs KO Div22                  | Two-way ANOVA and Bonferroni post hoc test |
|    | 0,7418  | WT Div18 vs WT Div22 (in time)  | Two-way ANOVA and Bonferroni post hoc test |
|    | 0,4593  | KO Div18 vs KO Div 22 (in time) | Two-way ANOVA and Bonferroni post hoc test |
| 2J | 0,329   | WT vs KO WFMR Ratio             | Student's t-test                           |
| 2K | 0,05    | WT vs KO WFMR [Hz]              | Student's t-test                           |

|                 |                |                                   |                                            |
|-----------------|----------------|-----------------------------------|--------------------------------------------|
| 2M              | >0,99          | WT vs KO Div3                     | Two-way ANOVA and Bonferroni post hoc test |
|                 | >0,99          | WT vs KO Div8                     | Two-way ANOVA and Bonferroni post hoc test |
|                 | 0,05           | WT vs KO Div14                    | Two-way ANOVA and Bonferroni post hoc test |
|                 | 0,01           | WT vs KO Div18                    | Two-way ANOVA and Bonferroni post hoc test |
|                 | 0,03           | WT vs KO Div22                    | Two-way ANOVA and Bonferroni post hoc test |
| 2N              | >0,99          | WT vs KO Div3                     | Two-way ANOVA and Bonferroni post hoc test |
|                 | >0,99          | WT vs KO Div8                     | Two-way ANOVA and Bonferroni post hoc test |
|                 | 0,04           | WT vs KO Div14                    | Two-way ANOVA and Bonferroni post hoc test |
|                 | 0,13           | WT vs KO Div18                    | Two-way ANOVA and Bonferroni post hoc test |
|                 | 0,04           | WT vs KO Div22                    | Two-way ANOVA and Bonferroni post hoc test |
| 2O              | >0,99          | WT vs KO Div3                     | Two-way ANOVA and Bonferroni post hoc test |
|                 | 0,02           | WT vs KO Div8                     | Two-way ANOVA and Bonferroni post hoc test |
|                 | 0,03           | WT vs KO Div14                    | Two-way ANOVA and Bonferroni post hoc test |
|                 | 0,45           | WT vs KO Div18                    | Two-way ANOVA and Bonferroni post hoc test |
|                 | 0,41           | WT vs KO Div22                    | Two-way ANOVA and Bonferroni post hoc test |
| 2P              | 0,10           | WT vs KO Div8                     | Two-way ANOVA and Bonferroni post hoc test |
|                 | 0,55           | WT vs KO Div14                    | Two-way ANOVA and Bonferroni post hoc test |
|                 | 0,00           | WT vs KO Div18                    | Two-way ANOVA and Bonferroni post hoc test |
|                 | 0,01           | WT vs KO Div22                    | Two-way ANOVA and Bonferroni post hoc test |
| 2Q              | <0,0001        | WT vs KO Div22                    | Two-way ANOVA and Bonferroni post hoc test |
| <b>Figure 3</b> | <b>P value</b> | <b>Comparison</b>                 | <b>Statistical test</b>                    |
| 3B              | 0,0040         | KO vs KO +CX546 Div3-6 Max length | One-way ANOVA and Tukey's post hoc test    |
|                 | 0,0300         | KO vs KO +CX546 Div3-6 TDL        | One-way ANOVA and Tukey's post hoc test    |

|    |         |                                                         |                                           |
|----|---------|---------------------------------------------------------|-------------------------------------------|
|    | 0,6930  | KO vs KO +CX546 Div3-6 Polarization                     | One-way ANOVA and Tukey's post hoc test   |
|    | 0,0120  | KO vs KO +CX546 Div3-6 n° of intersections              | One-way ANOVA and Tukey's post hoc test   |
|    | 0,0107  | KO vs KO +CX546 Div3-6 Soma size                        | One-way ANOVA and Tukey's post hoc test   |
|    | 0,9890  | KO vs KO +CX546 Div7-10 Max length                      | One-way ANOVA and Tukey's post hoc test   |
|    | 0,0300  | KO vs KO +CX546 Div7-10 TDL                             | One-way ANOVA and Tukey's post hoc test   |
|    | 0,0930  | KO vs KO +CX546 Div7-10 Polarization                    | One-way ANOVA and Tukey's post hoc test   |
|    | 0,0004  | KO vs KO +CX546 Div7-10 n° of intersections             | One-way ANOVA and Tukey's post hoc test   |
|    | 0,0037  | KO vs KO +CX546 Div7-10 Soma size                       | One-way ANOVA and Tukey's post hoc test   |
|    | 0,0100  | KO +CX546 Div3-6 vs KO +CX546 DIV7-10 Max length        | One-way ANOVA and Tukey's post hoc test   |
|    | 0,9900  | KO+CX546 Div3-6 vs KO+CX546 DIV7-10 TDL                 | One-way ANOVA and Tukey's post hoc test   |
|    | 0,4627  | KO+CX546 Div3-6 vs KO+CX546 DIV7-10Polarization         | One-way ANOVA and Tukey's post hoc test   |
|    | 0,4240  | KO+CX546 Div3-6 vs KO+CX546 DIV7-10 n° of intersections | One-way ANOVA and Tukey's post hoc test   |
|    | 0,6065  | KO+CX546 Div3-6 vs KO+CX546 DIV7-10 Soma size           | One-way ANOVA and Tukey's post hoc test   |
| 3G | <0,0001 | KO vs KO+Cx546 Div3-6 Arc                               | One-way ANOVA and Dunnett's post hoc test |
|    | 0,0051  | KO vs KO+Cx546 Div3-6 Arhgdig                           | One-way ANOVA and Dunnett's post hoc test |
|    | 0,0228  | KO vs KO+Cx546 Div3-6 Bdnf                              | One-way ANOVA and Dunnett's post hoc test |
|    | 0,0064  | KO vs KO+Cx546 Div3-6 Cacna1d                           | One-way ANOVA and Dunnett's post hoc test |
|    | 0,0211  | KO vs KO+Cx546 Div3-6 Camk2b                            | One-way ANOVA and Dunnett's post hoc test |
|    | 0,3305  | KO vs KO+Cx546 Div3-6 Clcn3                             | One-way ANOVA and Dunnett's post hoc test |
|    | 0,0411  | KO vs KO+Cx546 Div3-6 Dcx                               | One-way ANOVA and Dunnett's post hoc test |
|    | 0,2991  | KO vs KO+Cx546 Div3-6 Gabbr1                            | One-way ANOVA and Dunnett's post hoc test |
|    | 0,7485  | KO vs KO+Cx546 Div3-6 Gabra3                            | One-way ANOVA and Dunnett's post hoc test |

|    |        |                                |                                           |
|----|--------|--------------------------------|-------------------------------------------|
|    | 0,0051 | KO vs KO+Cx546 Div3-6 Gap43    | One-way ANOVA and Dunnett's post hoc test |
|    | 0,9395 | KO vs KO+Cx546 Div3-6 Gria2    | One-way ANOVA and Dunnett's post hoc test |
|    | 0,0260 | KO vs KO+Cx546 Div3-6 Grin1    | One-way ANOVA and Dunnett's post hoc test |
|    | 0,5532 | KO vs KO+Cx546 Div3-6 Grm5     | One-way ANOVA and Dunnett's post hoc test |
|    | 0,0005 | KO vs KO+Cx546 Div3-6 Kcc2     | One-way ANOVA and Dunnett's post hoc test |
|    | 0,2557 | KO vs KO+Cx546 Div3-6 Kcnq2    | One-way ANOVA and Dunnett's post hoc test |
|    | 0,0010 | KO vs KO+Cx546 Div3-6 Kcnq3    | One-way ANOVA and Dunnett's post hoc test |
|    | 0,0361 | KO vs KO+Cx546 Div3-6 Map2     | One-way ANOVA and Dunnett's post hoc test |
|    | 0,0265 | KO vs KO+Cx546 Div3-6 Neun     | One-way ANOVA and Dunnett's post hoc test |
|    | 0,0077 | KO vs KO+Cx546 Div3-6 Nr4a1    | One-way ANOVA and Dunnett's post hoc test |
|    | 0,0255 | KO vs KO+Cx546 Div3-6 Nurr1    | One-way ANOVA and Dunnett's post hoc test |
|    | 0,5724 | KO vs KO+Cx546 Div3-6 Psd95    | One-way ANOVA and Dunnett's post hoc test |
|    | 0,8894 | KO vs KO+Cx546 Div3-6 Satb2    | One-way ANOVA and Dunnett's post hoc test |
|    | 0,1364 | KO vs KO+Cx546 Div3-6 Scn2b    | One-way ANOVA and Dunnett's post hoc test |
|    | 0,9045 | KO vs KO+Cx546 Div3-6 Scn3b    | One-way ANOVA and Dunnett's post hoc test |
|    | 0,3100 | KO vs KO+Cx546 Div3-6 Scn8a    | One-way ANOVA and Dunnett's post hoc test |
|    | 0,1787 | KO vs KO+Cx546 Div3-6 Syn1     | One-way ANOVA and Dunnett's post hoc test |
|    | 0,0002 | KO vs KO+Cx546 Div3-6 Tuj1     | One-way ANOVA and Dunnett's post hoc test |
| 3H | 0,6740 | KO vs KO+Cx546 Div7-10 Arc     | One-way ANOVA and Dunnett's post hoc test |
|    | 0,6678 | KO vs KO+Cx546 Div7-10 Arhgdig | One-way ANOVA and Dunnett's post hoc test |
|    | 0,9862 | KO vs KO+Cx546 Div7-10 Bdnf    | One-way ANOVA and Dunnett's post hoc test |
|    | 0,0360 | KO vs KO+Cx546 Div7-10 Cacna1d | One-way ANOVA and Dunnett's post hoc test |



|  |         |                               |                                           |
|--|---------|-------------------------------|-------------------------------------------|
|  | 0,5926  | KO vs KO+Cx546 Div7-10 Camk2b | One-way ANOVA and Dunnett's post hoc test |
|  | 0,9808  | KO vs KO+Cx546 Div7-10 Clcn3  | One-way ANOVA and Dunnett's post hoc test |
|  | 0,5118  | KO vs KO+Cx546 Div7-10 Dcx    | One-way ANOVA and Dunnett's post hoc test |
|  | 0,9814  | KO vs KO+Cx546 Div7-10 Gabbr1 | One-way ANOVA and Dunnett's post hoc test |
|  | 0,3684  | KO vs KO+Cx546 Div7-10 Gabra3 | One-way ANOVA and Dunnett's post hoc test |
|  | 0,5243  | KO vs KO+Cx546 Div7-10 Gap43  | One-way ANOVA and Dunnett's post hoc test |
|  | 0,6163  | KO vs KO+Cx546 Div7-10 Gria2  | One-way ANOVA and Dunnett's post hoc test |
|  | 0,2411  | KO vs KO+Cx546 Div7-10 Grin1  | One-way ANOVA and Dunnett's post hoc test |
|  | 0,8692  | KO vs KO+Cx546 Div7-10 Grm5   | One-way ANOVA and Dunnett's post hoc test |
|  | 0,0294  | KO vs KO+Cx546 Div7-10 Kcc2   | One-way ANOVA and Dunnett's post hoc test |
|  | 0,9232  | KO vs KO+Cx546 Div7-10 Kcnq2  | One-way ANOVA and Dunnett's post hoc test |
|  | 0,1323  | KO vs KO+Cx546 Div7-10 Kcnq3  | One-way ANOVA and Dunnett's post hoc test |
|  | 0,8224  | KO vs KO+Cx546 Div7-10 Map2   | One-way ANOVA and Dunnett's post hoc test |
|  | 0,7530  | KO vs KO+Cx546 Div7-10 Neun   | One-way ANOVA and Dunnett's post hoc test |
|  | 0,6869  | KO vs KO+Cx546 Div7-10 Nr4a1  | One-way ANOVA and Dunnett's post hoc test |
|  | 0,8015  | KO vs KO+Cx546 Div7-10 Nurr1  | One-way ANOVA and Dunnett's post hoc test |
|  | 0,9999  | KO vs KO+Cx546 Div7-10 Psd95  | One-way ANOVA and Dunnett's post hoc test |
|  | 0,6884  | KO vs KO+Cx546 Div7-10 Satb2  | One-way ANOVA and Dunnett's post hoc test |
|  | 0,1788  | KO vs KO+Cx546 Div7-10 Scn2b  | One-way ANOVA and Dunnett's post hoc test |
|  | 0,9483  | KO vs KO+Cx546 Div7-10 Scn3b  | One-way ANOVA and Dunnett's post hoc test |
|  | 0,7654  | KO vs KO+Cx546 Div7-10 Scn8a  | One-way ANOVA and Dunnett's post hoc test |
|  | >0,9999 | KO vs KO+Cx546 Div7-10 Syn1   | One-way ANOVA and Dunnett's post hoc test |

|                 |                |                             |                                            |
|-----------------|----------------|-----------------------------|--------------------------------------------|
|                 | 0,9668         | KO vs KO+Cx546 Div7-10 Tuj1 | One-way ANOVA and Dunnett's post hoc test  |
| <b>Figure 4</b> | <b>P value</b> | <b>Comparison</b>           | <b>Statistical test</b>                    |
| 4B              | > 0,9999       | WT vs KO 10                 | Two-way ANOVA and Bonferroni post hoc test |
|                 | > 0,9999       | WT vs KO 35                 | Two-way ANOVA and Bonferroni post hoc test |
|                 | 0,0002         | WT vs KO 60                 | Two-way ANOVA and Bonferroni post hoc test |
|                 | 0,211          | WT vs KO 85                 | Two-way ANOVA and Bonferroni post hoc test |
|                 | 0,2813         | WT vs KO 110                | Two-way ANOVA and Bonferroni post hoc test |
|                 | 0,251          | WT vs KO 135                | Two-way ANOVA and Bonferroni post hoc test |
|                 | > 0,9999       | WT vs KO 160                | Two-way ANOVA and Bonferroni post hoc test |
|                 | > 0,9999       | WT vs KO 185                | Two-way ANOVA and Bonferroni post hoc test |
|                 | > 0,9999       | WT vs KO 210                | Two-way ANOVA and Bonferroni post hoc test |
|                 | > 0,9999       | WT vs KO 235                | Two-way ANOVA and Bonferroni post hoc test |
|                 | > 0,9999       | WT vs KO +CX546 Div3-6 10   | Two-way ANOVA and Bonferroni post hoc test |
|                 | > 0,9999       | WT vs KO+CX546 Div3-6 35    | Two-way ANOVA and Bonferroni post hoc test |
|                 | > 0,9999       | WT vs KO +CX546 Div3-6 60   | Two-way ANOVA and Bonferroni post hoc test |
|                 | > 0,9999       | WT vs KO+CX546 Div3-6 85    | Two-way ANOVA and Bonferroni post hoc test |
|                 | > 0,9999       | WT vs KO+CX546 Div3-6 110   | Two-way ANOVA and Bonferroni post hoc test |
|                 | 0,7362         | WT vs KO +CX546 Div3-6 135  | Two-way ANOVA and Bonferroni post hoc test |
|                 | 0,6316         | WT vs KO +CX546 Div3-6160   | Two-way ANOVA and Bonferroni post hoc test |
|                 | > 0,9999       | WT vs KO+CX546 Div3-6 185   | Two-way ANOVA and Bonferroni post hoc test |
|                 | > 0,9999       | WT vs KO+CX546 Div3-6210    | Two-way ANOVA and Bonferroni post hoc test |
|                 | > 0,9999       | WT vs KO+CX546 Div3-6 235   | Two-way ANOVA and Bonferroni post hoc test |
|                 | > 0,9999       | KO vs KO+CX546 Div3-6 10    | Two-way ANOVA and Bonferroni post hoc test |

|    |          |                            |                                            |
|----|----------|----------------------------|--------------------------------------------|
|    | > 0,9999 | KO vs KO +CX546 Div3-6 35  | Two-way ANOVA and Bonferroni post hoc test |
|    | 0,0034   | KO vs KO+CX546 Div3-6 60   | Two-way ANOVA and Bonferroni post hoc test |
|    | > 0,9999 | KO vs KO+CX546 Div3-6 85   | Two-way ANOVA and Bonferroni post hoc test |
|    | 0,2676   | KO vs KO+CX546 Div3-6 110  | Two-way ANOVA and Bonferroni post hoc test |
|    | > 0,9999 | KO vs KO+CX546 Div3-6 135  | Two-way ANOVA and Bonferroni post hoc test |
|    | > 0,9999 | KO vs KO+CX546 Div3-6160   | Two-way ANOVA and Bonferroni post hoc test |
|    | > 0,9999 | KO vs KO+CX546 Div3-6185   | Two-way ANOVA and Bonferroni post hoc test |
|    | > 0,9999 | KO vs KO +CX546 Div3-6 210 | Two-way ANOVA and Bonferroni post hoc test |
|    | > 0,9999 | KO vs KO+CX546 Div3-6 235  | Two-way ANOVA and Bonferroni post hoc test |
| 4C | > 0,9999 | WT vs KO 10                | Two-way ANOVA and Bonferroni post hoc test |
|    | > 0,9999 | WT vs KO 35                | Two-way ANOVA and Bonferroni post hoc test |
|    | 0,0004   | WT vs KO 60                | Two-way ANOVA and Bonferroni post hoc test |
|    | 0,2539   | WT vs KO 85                | Two-way ANOVA and Bonferroni post hoc test |
|    | 0,331    | WT vs KO 110               | Two-way ANOVA and Bonferroni post hoc test |
|    | 0,2981   | WT vs KO 135               | Two-way ANOVA and Bonferroni post hoc test |
|    | > 0,9999 | WT vs KO 160               | Two-way ANOVA and Bonferroni post hoc test |
|    | > 0,9999 | WT vs KO 185               | Two-way ANOVA and Bonferroni post hoc test |
|    | > 0,9999 | WT vs KO 210               | Two-way ANOVA and Bonferroni post hoc test |
|    | > 0,9999 | WT vs KO 235               | Two-way ANOVA and Bonferroni post hoc test |
|    | > 0,9999 | WT vs KO+CX546 Div7-10 10  | Two-way ANOVA and Bonferroni post hoc test |
|    | > 0,9999 | WT vs KO+CX546 Div7-10 35  | Two-way ANOVA and Bonferroni post hoc test |
|    | < 0,0001 | WT vs KO+CX546 Div7-10 60  | Two-way ANOVA and Bonferroni post hoc test |

|    |          |                             |                                            |
|----|----------|-----------------------------|--------------------------------------------|
|    | > 0,9999 | WT vs KO+CX546 Div7-10 85   | Two-way ANOVA and Bonferroni post hoc test |
|    | 0,0261   | WT vs KO+CX546 Div7-10 110  | Two-way ANOVA and Bonferroni post hoc test |
|    | 0,0265   | WT vs KO+CX546 Div7-10 135  | Two-way ANOVA and Bonferroni post hoc test |
|    | > 0,9999 | WT vs KO+CX546 Div7-10 160  | Two-way ANOVA and Bonferroni post hoc test |
|    | > 0,9999 | WT vs KO+CX546 Div7-10 185  | Two-way ANOVA and Bonferroni post hoc test |
|    | > 0,9999 | WT vs KO +CX546 Div7-10 210 | Two-way ANOVA and Bonferroni post hoc test |
|    | > 0,9999 | WT vs KO+CX546 Div7-10 235  | Two-way ANOVA and Bonferroni post hoc test |
|    | > 0,9999 | KO vs KO+CX546 Div7-1010    | Two-way ANOVA and Bonferroni post hoc test |
|    | > 0,9999 | KO vs KO+CX546 Div7-10 35   | Two-way ANOVA and Bonferroni post hoc test |
|    | 0,1093   | KO vs KO+CX546 Div7-10 60   | Two-way ANOVA and Bonferroni post hoc test |
|    | 0,595    | KO vs KO+CX546 Div7-10 85   | Two-way ANOVA and Bonferroni post hoc test |
|    | 0,6439   | KO vs KO+CX546 Div7-10 110  | Two-way ANOVA and Bonferroni post hoc test |
|    | 0,6995   | KO vs KO+CX546 Div7-10 135  | Two-way ANOVA and Bonferroni post hoc test |
|    | > 0,9999 | KO vs KO+CX546 Div7-10 160  | Two-way ANOVA and Bonferroni post hoc test |
|    | > 0,9999 | KO vs KO+CX546 Div7-10 185  | Two-way ANOVA and Bonferroni post hoc test |
|    | > 0,9999 | KO vs KO+CX546 Div7-10 210  | Two-way ANOVA and Bonferroni post hoc test |
|    | > 0,9999 | KO vs KO+CX546 Div7-10 235  | Two-way ANOVA and Bonferroni post hoc test |
| 4E | 0,0026   | WT vs KO Div3               | Two-way ANOVA and Bonferroni post hoc test |
|    | <0,0001  | WT vs KO Div6               | Two-way ANOVA and Bonferroni post hoc test |
|    | <0,0001  | WT vs KO Div9               | Two-way ANOVA and Bonferroni post hoc test |
| 4F | <0,0001  | WT vs KO                    | One-way ANOVA and Tukey's post hoc test    |
|    | 0,06     | WT vs KO+Cx546 Div3-6       | One-way ANOVA and Tukey's post hoc test    |

|    |         |                           |                                         |
|----|---------|---------------------------|-----------------------------------------|
|    | <0,0001 | KO vs KO+CX546 Div7-10    | One-way ANOVA and Tukey's post hoc test |
| 4G | <0,0001 | WT vs KO                  | One-way ANOVA and Tukey's post hoc test |
|    | <0,0001 | WT vs KO+Cx546 Div3-6     | One-way ANOVA and Tukey's post hoc test |
|    | >0,999  | KO vs KO+CX546 Div7-10    | One-way ANOVA and Tukey's post hoc test |
| 4I | 0,3447  | KO vs KO+CX546 Camk2b     | One-way ANOVA and Tukey's post hoc test |
|    | 0,023   | KO vs KO+CX546 Gabbr1     | One-way ANOVA and Tukey's post hoc test |
|    | 0,0346  | KO vs KO+CX546 Gap43      | One-way ANOVA and Tukey's post hoc test |
|    | 0,0365  | KO vs KO+CX546 Grin1      | One-way ANOVA and Tukey's post hoc test |
|    | 0,0005  | KO vs KO+CX546 Kcc2       | One-way ANOVA and Tukey's post hoc test |
|    | 0,0152  | KO vs KO+CX546 Rest       | One-way ANOVA and Tukey's post hoc test |
|    | 0,1561  | KO vs KO+CX546 Scn2b      | One-way ANOVA and Tukey's post hoc test |
|    | 0,1053  | KO vs KO+CX546 Scn3b      | One-way ANOVA and Tukey's post hoc test |
|    | 0,0277  | KO vs KO+CX546 Tuj1       | One-way ANOVA and Tukey's post hoc test |
|    | 0,6368  | KO vs KO+CX546+Nif Camk2b | One-way ANOVA and Tukey's post hoc test |
|    | 0,5597  | KO vs KO+CX546+Nif Gabbr1 | One-way ANOVA and Tukey's post hoc test |
|    | 0,0016  | KO vs KO+CX546+Nif Gap43  | One-way ANOVA and Tukey's post hoc test |
|    | 0,6612  | KO vs KO+CX546+Nif Grin1  | One-way ANOVA and Tukey's post hoc test |
|    | 0,815   | KO vs KO+CX546+Nif Kcc2   | One-way ANOVA and Tukey's post hoc test |
|    | 0,7162  | KO vs KO+CX546+Nif Rest   | One-way ANOVA and Tukey's post hoc test |
|    | 0,6096  | KO vs KO+CX546+Nif Scn2b  | One-way ANOVA and Tukey's post hoc test |
|    | 0,0624  | KO vs KO+CX546+Nif Scn3b  | One-way ANOVA and Tukey's post hoc test |
|    | 0,9287  | KO vs KO+CX546+Nif Tuj1   | One-way ANOVA and Tukey's post hoc test |

|                 |                |                                 |                                            |
|-----------------|----------------|---------------------------------|--------------------------------------------|
|                 | 0,0498         | KO+CX546 vs KO+CX546+Nif Camk2b | One-way ANOVA and Tukey's post hoc test    |
|                 | 0,0007         | KO+CX546 vs KO+CX546+Nif Gabbr1 | One-way ANOVA and Tukey's post hoc test    |
|                 | 0,2113         | KO+CX546 vs KO+CX546+Nif Gap43  | One-way ANOVA and Tukey's post hoc test    |
|                 | 0,0031         | KO+CX546 vs KO+CX546+Nif Grin1  | One-way ANOVA and Tukey's post hoc test    |
|                 | 0,0031         | KO+CX546 vs KO+CX546+Nif Kcc2   | One-way ANOVA and Tukey's post hoc test    |
|                 | 0,0902         | KO+CX546 vs KO+CX546+Nif Rest   | One-way ANOVA and Tukey's post hoc test    |
|                 | 0,0111         | KO+CX546 vs KO+CX546+Nif Scn2b  | One-way ANOVA and Tukey's post hoc test    |
|                 | 0,8402         | KO+CX546 vs KO+CX546+Nif Scn3b  | One-way ANOVA and Tukey's post hoc test    |
|                 | 0,01           | KO+CX546 vs KO+CX546+Nif Tuj1   | One-way ANOVA and Tukey's post hoc test    |
| 4L              | 0,0067         | KO vs KO+CX546                  | One-way ANOVA and Tukey's post hoc test    |
|                 | 0,9945         | KO vs KO+CX546+Nif              | One-way ANOVA and Tukey's post hoc test    |
|                 | 0,009          | KO CX vs KO+CX546+Nif           | One-way ANOVA and Tukey's post hoc test    |
| <b>Figure 5</b> | <b>P value</b> | <b>Comparison</b>               | <b>Statistical test</b>                    |
| 5B              | 0,002          | KO vs KO+CX546                  | Gehan-Breslow-Wilcoxon test                |
| 5C              | < 0,0001       | WT vs KO P30                    | Two-way ANOVA and Bonferroni post hoc test |
|                 | 0,0002         | WT vs KO P50                    | Two-way ANOVA and Bonferroni post hoc test |
|                 | 0,004          | WT vs KO P70                    | Two-way ANOVA and Bonferroni post hoc test |
|                 | 0,9759         | WT vs KO P90                    | Two-way ANOVA and Bonferroni post hoc test |
|                 | 0,4899         | WT vs KO+CX546 P30              | Two-way ANOVA and Bonferroni post hoc test |
|                 | 0,1828         | WT vs KO+CX546 P50              | Two-way ANOVA and Bonferroni post hoc test |
|                 | 0,9989         | WT vs KO+CX546 P70              | Two-way ANOVA and Bonferroni post hoc test |
|                 | 0,563          | WT vs KO+CX546 P90              | Two-way ANOVA and Bonferroni post hoc test |
|                 | 0,0013         | KO vs KO+CX546 P30              | Two-way ANOVA and Bonferroni post hoc test |

|    |          |                           |                                            |
|----|----------|---------------------------|--------------------------------------------|
|    | < 0,0001 | KO vs KO+CX546 P50        | Two-way ANOVA and Bonferroni post hoc test |
|    | 0,0018   | KO vs KO+CX546 P70        | Two-way ANOVA and Bonferroni post hoc test |
|    | 0,8901   | KO vs KO+CX546 P90        | Two-way ANOVA and Bonferroni post hoc test |
| 5F | 0,0082   | WT vs KO time1            | Two-way ANOVA and Bonferroni post hoc test |
|    | 0,0195   | WT vs KO time2            | Two-way ANOVA and Bonferroni post hoc test |
|    | 0,0799   | WT vs KO time3            | Two-way ANOVA and Bonferroni post hoc test |
|    | 0,0033   | WT vs KO+CX546 time1      | Two-way ANOVA and Bonferroni post hoc test |
|    | 0,241    | WT vs KO+CX546 time2      | Two-way ANOVA and Bonferroni post hoc test |
|    | 0,7582   | WT vs KO+CX546 time3      | Two-way ANOVA and Bonferroni post hoc test |
|    | 0,5645   | KO time 1 vs time 2       | Two-way ANOVA and Bonferroni post hoc test |
|    | 0,1088   | KO time 1 vs time 3       | Two-way ANOVA and Bonferroni post hoc test |
|    | >0,9999  | KO time 2 vs time 3       | Two-way ANOVA and Bonferroni post hoc test |
|    | 0,0319   | KO+CX546 time 1 vs time 2 | Two-way ANOVA and Bonferroni post hoc test |
|    | 0,0025   | KO+CX546 time 1 vs time 3 | Two-way ANOVA and Bonferroni post hoc test |
|    | >0,9999  | KO+CX546 time 2 vs time 3 | Two-way ANOVA and Bonferroni post hoc test |
|    | 0,7693   | WT time 1 vs time 2       | Two-way ANOVA and Bonferroni post hoc test |
|    | 0,3885   | WT time 1 vs time 3       | Two-way ANOVA and Bonferroni post hoc test |
|    | >0,9999  | WT time 2 vs time 3       | Two-way ANOVA and Bonferroni post hoc test |
| 5G | 0,0184   | WT vs KO                  | One-way ANOVA and Tukey's post hoc test    |
|    | 0,0732   | WT vs KO+CX546            | One-way ANOVA and Tukey's post hoc test    |
|    | 0,676    | KO vs KO+CX546            | One-way ANOVA and Tukey's post hoc test    |
| 5H | 0,069    | WT vs KO                  | One-way ANOVA and Tukey's post hoc test    |

|                   |                |                                                    |                                                                   |
|-------------------|----------------|----------------------------------------------------|-------------------------------------------------------------------|
|                   | 0,6252         | WT vs KO+CX546                                     | One-way ANOVA and Tukey's post hoc test                           |
| 5I                | 0,0071         | WT vs KO                                           | One-way ANOVA and Tukey's post hoc test                           |
|                   | 0,5672         | WT vs KO+CX546                                     | One-way ANOVA and Tukey's post hoc test                           |
| 5J                | 0,0472         | WT vs KO                                           | One-way ANOVA and Tukey's post hoc test                           |
|                   | 0,9809         | WT vs KO+CX546                                     | One-way ANOVA and Tukey's post hoc test                           |
| <b>Figure EV1</b> | <b>P value</b> | <b>Comparison</b>                                  | <b>Statistical test</b>                                           |
| EV1 C             | 0,084          | WT vs KO Div8                                      | Student's t-test                                                  |
| EV1 D             | <0,0001        | DIV0 vs. DIV3                                      | One-way ANOVA and Tukey's post hoc test                           |
|                   | <0,0001        | DIV0 vs. DIV8                                      | One-way ANOVA and Tukey's post hoc test                           |
|                   | <0,0001        | DIV0 vs. DIV14                                     | One-way ANOVA and Tukey's post hoc test                           |
|                   | 0,5731         | DIV3 vs. DIV8                                      | One-way ANOVA and Tukey's post hoc test                           |
|                   | 0,0011         | DIV3 vs. DIV14                                     | One-way ANOVA and Tukey's post hoc test                           |
|                   | 0,0702         | DIV8 vs. DIV14                                     | One-way ANOVA and Tukey's post hoc test                           |
| EV1 F             | 0,485          | Tuj1 and Mecp2 positive vs Tuj1 and Mecp2 negative | Student's t-test                                                  |
|                   | 0,2155         | Gfap and Mecp2 positive vs Gfap and Mecp2 negative | Student's t-test                                                  |
| <b>Figure EV2</b> | <b>P value</b> | <b>Comparison</b>                                  | <b>Statistical test</b>                                           |
| EV2 B             | 1,456E-05      | WT vs KO Gria2                                     | Multiple t-test and Holm-Sidak correction for multiple comparison |
|                   | 0,0092352      | WT vs KO Gria3                                     | Multiple t-test and Holm-Sidak correction for multiple comparison |
|                   | 0,0628577      | WT vs KO Grin1                                     | Multiple t-test and Holm-Sidak correction for multiple comparison |
|                   | 0,0006896      | WT vs KO Grin2a                                    | Multiple t-test and Holm-Sidak correction for multiple comparison |
|                   | 0,0079372      | WT vs KO Grin2b                                    | Multiple t-test and Holm-Sidak correction for multiple comparison |
|                   | 0,0623571      | WT vs KO Gabrg2                                    | Multiple t-test and Holm-Sidak correction for multiple comparison |
|                   | 0,0145598      | WT vs KO Arc                                       | Multiple t-test and Holm-Sidak correction for multiple comparison |



|                   |                |                           |                                                                   |
|-------------------|----------------|---------------------------|-------------------------------------------------------------------|
|                   | 0,513755       | WT vs KO cFos             | Multiple t-test and Holm-Sidak correction for multiple comparison |
|                   | 0,0002487      | WT vs KO Neun             | Multiple t-test and Holm-Sidak correction for multiple comparison |
|                   | 0,0671653      | WT vs KO Map2             | Multiple t-test and Holm-Sidak correction for multiple comparison |
| <b>Figure EV3</b> | <b>P value</b> | <b>Comparison</b>         | <b>Statistical test</b>                                           |
| EV3 A             | >0,9999        | WT vs KO Div4             | Two-way ANOVA and Bonferroni post hoc test                        |
|                   | >0,9999        | WT vs KO Div8             | Two-way ANOVA and Bonferroni post hoc test                        |
|                   | 0,005          | WT vs KO Div14            | Two-way ANOVA and Bonferroni post hoc test                        |
| EV3 B             | 0,05           | WT vs WT+CX546            | One-way ANOVA and Tukey's post hoc test                           |
|                   | 0,8471         | WT vs WT+CX546+Nbqx       | One-way ANOVA and Tukey's post hoc test                           |
|                   | 0,0261         | WT+CX546 vs WT+CX546+Nbqx | One-way ANOVA and Tukey's post hoc test                           |
| <b>Figure EV4</b> | <b>P value</b> | <b>Comparison</b>         | <b>Statistical test</b>                                           |
| EV4 A             | 0,0021         | WT vs KO                  | One-way ANOVA and Tukey's post hoc test                           |
|                   | 0,8886         | WT vs KO+KCl 4mM          | One-way ANOVA and Tukey's post hoc test                           |
|                   | 0,0079         | KO vs KO+KCl 4mM          | One-way ANOVA and Tukey's post hoc test                           |
| EV4 B             | 0,0249         | WT vs KO                  | One-way ANOVA and Tukey's post hoc test                           |
|                   | 0,7201         | WT vs KO+KCl 4mM          | One-way ANOVA and Tukey's post hoc test                           |
|                   | 0,0876         | KO vs KO+KCl 4mM          | One-way ANOVA and Tukey's post hoc test                           |
| EV4 C             | 0,2023         | WT vs KO                  | One-way ANOVA and Tukey's post hoc test                           |
|                   | 0,1207         | WT vs KO+KCl 4mM          | One-way ANOVA and Tukey's post hoc test                           |
|                   | 0,0018         | KO vs KO+KCl 4mM          | One-way ANOVA and Tukey's post hoc test                           |
| EV4 D             | 0,0044         | WT vs KO                  | One-way ANOVA and Tukey's post hoc test                           |
|                   | 0,0708         | WT vs KO+KCl 4mM          | One-way ANOVA and Tukey's post hoc test                           |
|                   | 0,2834         | KO vs KO+KCl 4mM          | One-way ANOVA and Tukey's post hoc test                           |

|                  |                |                                                        |                                            |
|------------------|----------------|--------------------------------------------------------|--------------------------------------------|
| EV4 F            | 0,0001         | WT vs KO                                               | Two-way ANOVA and Bonferroni post hoc test |
|                  | > 0,9999       | WT+KCL vs KO+KCl div 0-7                               | Two-way ANOVA and Bonferroni post hoc test |
|                  | 0,05           | WT+KCL vs KO+KCl div 7-14                              | Two-way ANOVA and Bonferroni post hoc test |
|                  | > 0,9999       | WT vs KO+KCl div 0-7                                   | Two-way ANOVA and Bonferroni post hoc test |
|                  | 0,0006         | WT vs KO+KCl div 7-14                                  | Two-way ANOVA and Bonferroni post hoc test |
| EV4 G            | 0,0488         | WT vs KO                                               | Two-way ANOVA and Bonferroni post hoc test |
|                  | > 0,9999       | WT+KCL vs KO+KCl div 0-7                               | Two-way ANOVA and Bonferroni post hoc test |
|                  | 0,0026         | WT+KCL vs KO+KCl div 7-14                              | Two-way ANOVA and Bonferroni post hoc test |
|                  | 0,9249         | WT vs KO+KCl div 0-7                                   | Two-way ANOVA and Bonferroni post hoc test |
|                  | > 0,9999       | WT vs WT+ KCl div 7-14                                 | Two-way ANOVA and Bonferroni post hoc test |
| <b>Figure S1</b> | <b>P value</b> | <b>Comparison</b>                                      | <b>Statistical test</b>                    |
| S1 A             | 0,2573         | WT vs WT+CX546 Div3-6 n <sup>o</sup> of intersections  | One-way ANOVA and Tukey's post hoc test    |
|                  | 0,9012         | WT vs WT+CX546 Div7-10 n <sup>o</sup> of intersections | One-way ANOVA and Tukey's post hoc test    |
| S1 B             | 0,6597         | WT vs WT+CX546 Div3-6 TDL                              | One-way ANOVA and Tukey's post hoc test    |
|                  | 0,0724         | WT vs WT+CX546 Div7-10 TDL                             | One-way ANOVA and Tukey's post hoc test    |
| S1 C             | 0,9356         | WT vs WT+CX546 Div3-6 Max length                       | One-way ANOVA and Tukey's post hoc test    |
|                  | 0,5863         | WT vs WT+CX546 Div7-10 Max length                      | One-way ANOVA and Tukey's post hoc test    |
| S1 D             | 0,4155         | WT vs WT+CX546 Div3-6 Polarization                     | One-way ANOVA and Tukey's post hoc test    |
|                  | 0,3252         | WT vs WT+CX546 Div7-10 Polarization                    | One-way ANOVA and Tukey's post hoc test    |
| S1 E             | 0,2214         | WT vs WT+Cx546 Div3-6 Arc                              | One-way ANOVA and Dunnett's post hoc test  |
|                  | 0,679          | WT vs WT+Cx546 Div3-6 Arhgdig                          | One-way ANOVA and Dunnett's post hoc test  |
|                  | 0,8696         | WT vs WT+Cx546 Div3-6 Bdnf                             | One-way ANOVA and Dunnett's post hoc test  |
|                  | 0,9179         | WT vs WT+Cx546 Div3-6 Cacna1d                          | One-way ANOVA and Dunnett's post hoc test  |

|  |        |                              |                                           |
|--|--------|------------------------------|-------------------------------------------|
|  | 0,5492 | WT vs WT+Cx546 Div3-6 Camk2b | One-way ANOVA and Dunnett's post hoc test |
|  | 0,8461 | WT vs WT+Cx546 Div3-6 Clcn3  | One-way ANOVA and Dunnett's post hoc test |
|  | 0,0114 | WT vs WT+Cx546 Div3-6 Dcx    | One-way ANOVA and Dunnett's post hoc test |
|  | 0,741  | WT vs WT+Cx546 Div3-6 Gabbr1 | One-way ANOVA and Dunnett's post hoc test |
|  | 0,2076 | WT vs WT+Cx546 Div3-6 Gabra3 | One-way ANOVA and Dunnett's post hoc test |
|  | 0,0689 | WT vs WT+Cx546 Div3-6 Gap43  | One-way ANOVA and Dunnett's post hoc test |
|  | 0,9258 | WT vs WT+Cx546 Div3-6 Gria2  | One-way ANOVA and Dunnett's post hoc test |
|  | 0,1921 | WT vs WT+Cx546 Div3-6 Grin1  | One-way ANOVA and Dunnett's post hoc test |
|  | 0,3262 | WT vs WT+Cx546 Div3-6 Grm5   | One-way ANOVA and Dunnett's post hoc test |
|  | 0,4782 | WT vs WT+Cx546 Div3-6 Kcc2   | One-way ANOVA and Dunnett's post hoc test |
|  | 0,0581 | WT vs WT+Cx546 Div3-6 Kcnq2  | One-way ANOVA and Dunnett's post hoc test |
|  | 0,0053 | WT vs WT+Cx546 Div3-6 Kcnq3  | One-way ANOVA and Dunnett's post hoc test |
|  | 0,3467 | WT vs WT+Cx546 Div3-6 Map2   | One-way ANOVA and Dunnett's post hoc test |
|  | 0,3467 | WT vs WT+Cx546 Div3-6 Neun   | One-way ANOVA and Dunnett's post hoc test |
|  | 0,3467 | WT vs WT+Cx546 Div3-6 Nr4a1  | One-way ANOVA and Dunnett's post hoc test |
|  | 0,3467 | WT vs WT+Cx546 Div3-6 Nurr1  | One-way ANOVA and Dunnett's post hoc test |
|  | 0,3467 | WT vs WT+Cx546 Div3-6 Psd95  | One-way ANOVA and Dunnett's post hoc test |
|  | 0,3467 | WT vs WT+Cx546 Div3-6 Scn2b  | One-way ANOVA and Dunnett's post hoc test |
|  | 0,3467 | WT vs WT+Cx546 Div3-6 Scn3b  | One-way ANOVA and Dunnett's post hoc test |
|  | 0,3467 | WT vs WT+Cx546 Div3-6 Scn8a  | One-way ANOVA and Dunnett's post hoc test |
|  | 0,3467 | WT vs WT+Cx546 Div3-6 Syn1   | One-way ANOVA and Dunnett's post hoc test |
|  | 0,3467 | WT vs WT+Cx546 Div3-6 Tuj1   | One-way ANOVA and Dunnett's post hoc test |

|      |        |                                |                                           |
|------|--------|--------------------------------|-------------------------------------------|
| S1 F | 0,7839 | WT vs WT+Cx546 Div7-10 Arc     | One-way ANOVA and Dunnett's post hoc test |
|      | 0,9912 | WT vs WT+Cx546 Div7-10 Arhgdig | One-way ANOVA and Dunnett's post hoc test |
|      | 0,9903 | WT vs WT+Cx546 Div7-10 Bdnf    | One-way ANOVA and Dunnett's post hoc test |
|      | 0,8638 | WT vs WT+Cx546 Div7-10 Cacna1d | One-way ANOVA and Dunnett's post hoc test |
|      | 0,9803 | WT vs WT+Cx546 Div7-10 Camk2b  | One-way ANOVA and Dunnett's post hoc test |
|      | 0,9819 | WT vs WT+Cx546 Div7-10 Clcn3   | One-way ANOVA and Dunnett's post hoc test |
|      | 0,7438 | WT vs WT+Cx546 Div7-10 Dcx     | One-way ANOVA and Dunnett's post hoc test |
|      | 0,9333 | WT vs WT+Cx546 Div7-10 Gabbr1  | One-way ANOVA and Dunnett's post hoc test |
|      | 0,5644 | WT vs WT+Cx546 Div7-10 Gabra3  | One-way ANOVA and Dunnett's post hoc test |
|      | 0,9969 | WT vs WT+Cx546 Div7-10 Gap43   | One-way ANOVA and Dunnett's post hoc test |
|      | 0,4102 | WT vs WT+Cx546 Div7-10 Gria2   | One-way ANOVA and Dunnett's post hoc test |
|      | 0,8126 | WT vs WT+Cx546 Div7-10 Grin1   | One-way ANOVA and Dunnett's post hoc test |
|      | 0,6001 | WT vs WT+Cx546 Div7-10 Grm5    | One-way ANOVA and Dunnett's post hoc test |
|      | 0,6001 | WT vs WT+Cx546 Div7-10 Kcc2    | One-way ANOVA and Dunnett's post hoc test |
|      | 0,5338 | WT vs WT+Cx546 Div7-10 Kcnq2   | One-way ANOVA and Dunnett's post hoc test |
|      | 0,9976 | WT vs WT+Cx546 Div7-10 Kcnq3   | One-way ANOVA and Dunnett's post hoc test |
|      | 0,5748 | WT vs WT+Cx546 Div7-10 Map2    | One-way ANOVA and Dunnett's post hoc test |
|      | 0,936  | WT vs WT+Cx546 Div7-10 Neun    | One-way ANOVA and Dunnett's post hoc test |
|      | 0,7794 | WT vs WT+Cx546 Div7-10 Nr4a1   | One-way ANOVA and Dunnett's post hoc test |
|      | 0,9964 | WT vs WT+Cx546 Div7-10 Nurr1   | One-way ANOVA and Dunnett's post hoc test |
|      | 0,9873 | WT vs WT+Cx546 Div7-10 Psd95   | One-way ANOVA and Dunnett's post hoc test |
|      | 0,9961 | WT vs WT+Cx546 Div7-10 Scn2b   | One-way ANOVA and Dunnett's post hoc test |

|                  |                |                              |                                            |
|------------------|----------------|------------------------------|--------------------------------------------|
|                  | 0,4494         | WT vs WT+Cx546 Div7-10 Scn3b | One-way ANOVA and Dunnett's post hoc test  |
|                  | 0,0933         | WT vs WT+Cx546 Div7-10 Scn8a | One-way ANOVA and Dunnett's post hoc test  |
|                  | 0,9841         | WT vs WT+Cx546 Div7-10 Syn1  | One-way ANOVA and Dunnett's post hoc test  |
|                  | 0,9924         | WT vs WT+Cx546 Div7-10 Tuj1  | One-way ANOVA and Dunnett's post hoc test  |
| <b>Figure S3</b> | <b>P value</b> | <b>Comparison</b>            | <b>Statistical test</b>                    |
| S3 A             | >0,9999        | WT vs WT+CX546               | Student's t-test                           |
| S3 B             | 0,8796         | WT vs WT+CX546 P30           | Two-way ANOVA and Bonferroni post hoc test |
|                  | 0,9271         | WT vs WT+CX546 P50           | Two-way ANOVA and Bonferroni post hoc test |
|                  | >0,9999        | WT vs WT+CX546 P70           | Two-way ANOVA and Bonferroni post hoc test |
|                  | 0,071          | WT vs WT+CX546 P90           | Two-way ANOVA and Bonferroni post hoc test |
| S3 D             | 0,4483         | WT vs WT+CX546               | Student's t-test                           |
| S3 E             | >0,9999        | WT vs WT+CX546               | Two-way ANOVA and Bonferroni post hoc test |
|                  | >0,9999        | WT vs KO                     | Two-way ANOVA and Bonferroni post hoc test |
|                  | >0,9999        | WT vs KO+CX546               | Two-way ANOVA and Bonferroni post hoc test |
| S3 F             | 0,82           | WT vs WT+CX546               | Student's t-test                           |
| S3 G             | 0,0754         | WT vs WT+CX546               | Student's t-test                           |
| S3 H             | 0,201          | WT vs WT+CX546               | Student's t-test                           |

### Appendix Figure S1:

**A-D:** Scatter plots showing the effects of early and late CX546 treatments on 4 morphological parameters analyzed in wt cultures. One-way ANOVA highlighted no difference between groups. Values represent the mean  $\pm$  SEM. Sample size:  $n \geq 12$  wells deriving from three independent preparations, for each well at least 15 cells were measured.

**E,F:** Scatter plots showing the effect of early and late CX546 treatments on the expression levels of 27 neuronal genes in wt cultures. One-way ANOVA highlighted no difference between groups. Values represent the mean  $\pm$  SEM. Sample size:  $n \geq 8$  wells deriving from two independent preparations.

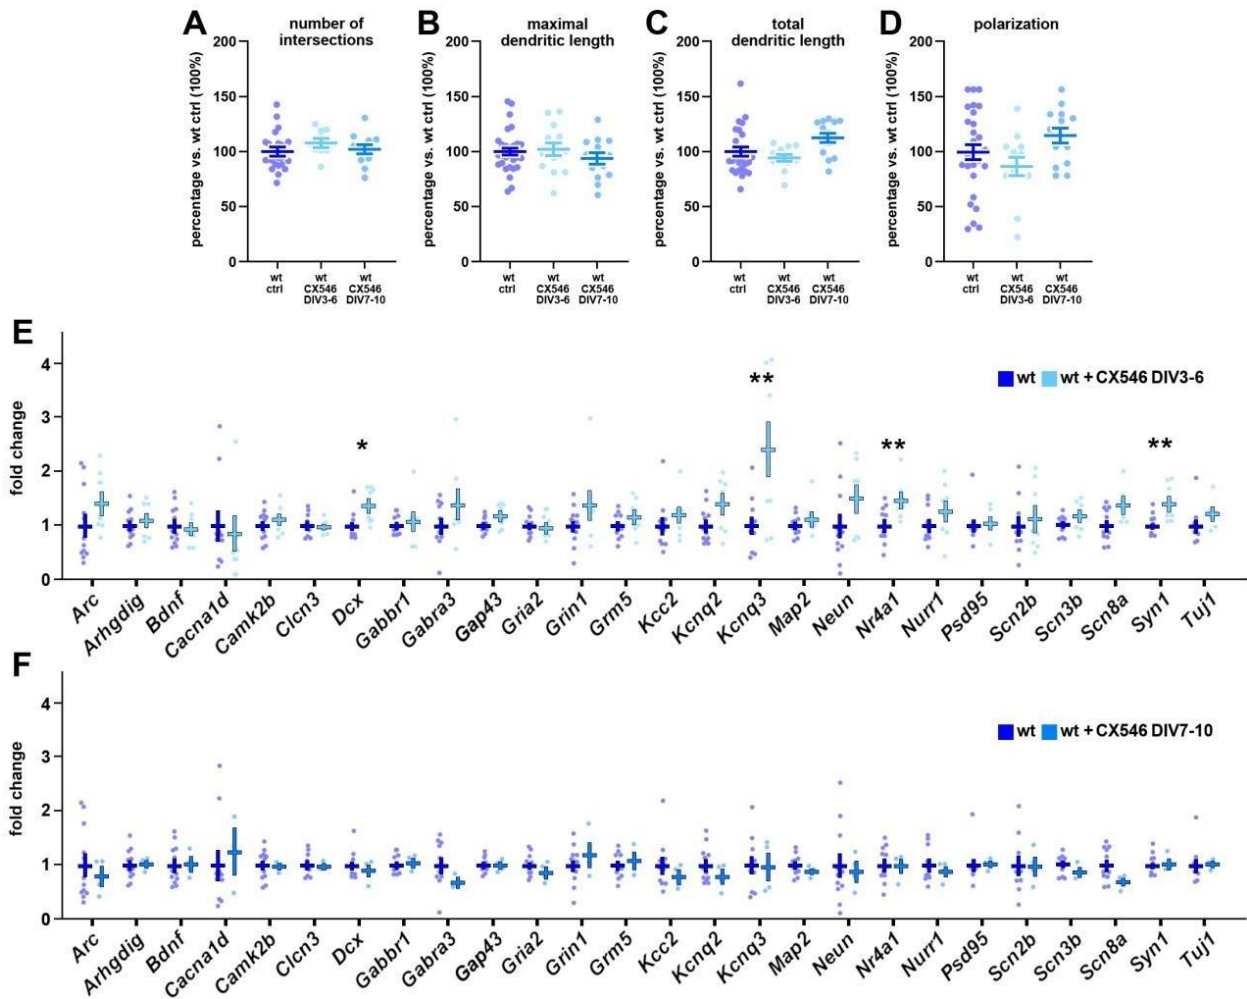

## Appendix Figure S2:

**A,B:** Two-way ANOVA followed by Bonferroni *post hoc* test, in which variables were batch and genotype, was used to highlight and discard batch effects. Our statistical approach identified 43 transcripts that survived the statistical cut-off, while only 8 were discarded (in gray). Significant p-values (<0,05) are depicted in red. Each bar of the graph (B) represents the average expression levels for each gene. Histograms show the mean  $\pm$  SEM. \*: p-value<0.05; \*\*: p-value<0.01; \*\*\*: p-value<0.001. Sample size:  $n \geq 18$  samples deriving from three independent preparations.

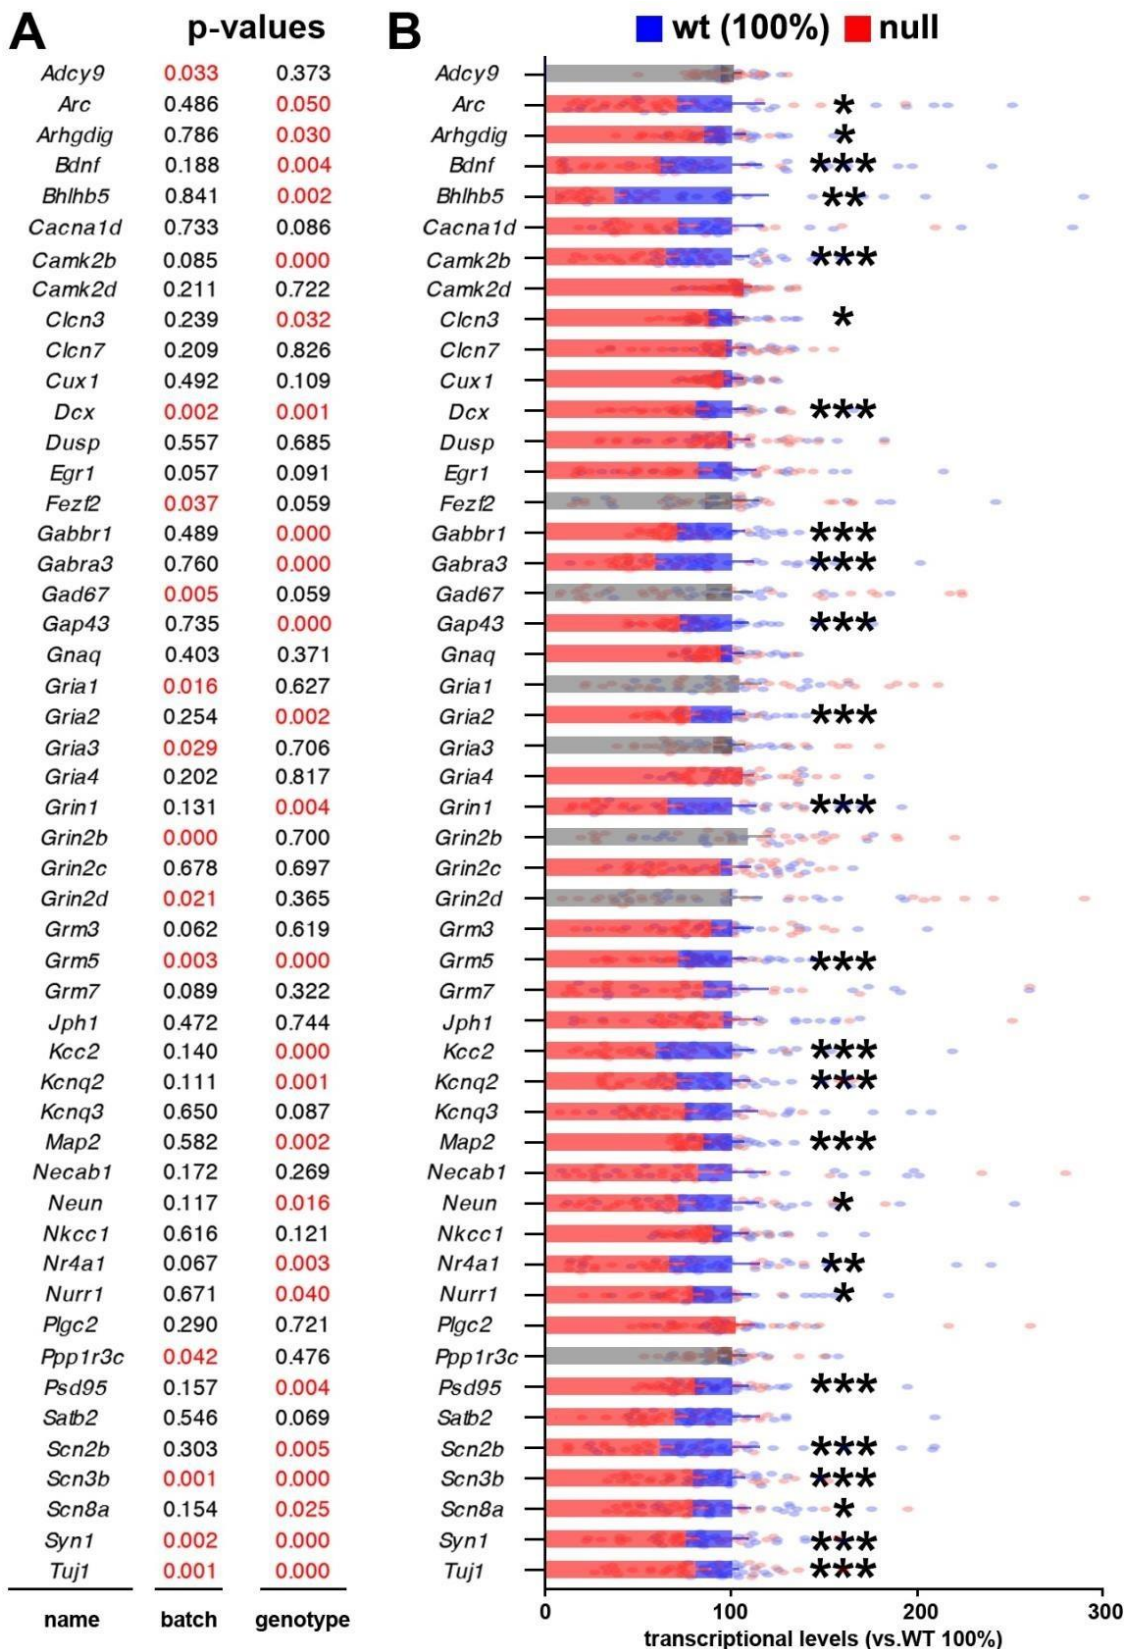

### Appendix Figure S3:

**A:** Kaplan-Mayer showing life span of wt mice treated with vehicle (blue) or with CX546 (light blue).

**B:** Scatter plots showing body weight of wt mice treated with vehicle or CX546 assessed at four different time points (P30, P50, P70 and P90). Two-Way ANOVA ( $F(3,75)=232,4;p<0,0001$ ) indicates a significant effect of time but not of treatment. Sample size:  $n=22$  (10 treated with vehicle and 12 treated with CX546).

**C-c':** The score for hind limbs claspings was assessed twice a week starting from P30 in wt mice treated with vehicle and wt mice treated with CX546. In c' severity scores were calculated at three different time points (P55, P70, P80). Sample size:  $n=22$  (10 treated with vehicle and 12 treated with CX546).

**D:** Scatter plot showing latency to fall on Rotarod of wt mice treated with vehicle or CX546. Student's t-test highlighted no difference between groups. Sample size:  $n=15$  (6 treated with vehicle and 9 treated with CX546). Each dot represents a single animal.

**E:** Scatter plot showing the time spent by mice exploring the two objects during the third day of test (depicted as %). Two-Way ANOVA did not indicate any significant effect of both genotype and treatment. Since all mice showed an exploration rate higher than 10% (depicted as dotted line) of the total time, they were all included in the Discrimination index assessment (see Materials and Methods). Data are represented as values  $\pm$  SEM. Sample size:  $n=16$  wt (8 treated with vehicle and 8 treated with CX546) and  $n=12$  ko (6 treated with vehicle and 6 treated with CX546). Each dot represents a single animal.

**F:** Scatter plot showing the assessment of the discrimination index (DI) between two different objects for each mouse during the last trial of a Novel Object Recognition test in wt mice treated with vehicle or CX546. Student's t-test highlighted no significant difference between groups. Sample size:  $n=16$  wt (8 treated with vehicle and 8 treated with CX546). Each dot represents a single animal.

**G,H:** Expression level of *Bdnf* and *Kcc2* measured in cortical samples of P45 wt mice treated with vehicle or CX546. Student's t-test highlighted no significant difference between groups. Sample size:  $n=15$  wt (10 treated with vehicle and 5 treated with CX546). Each dot represents a single animal.

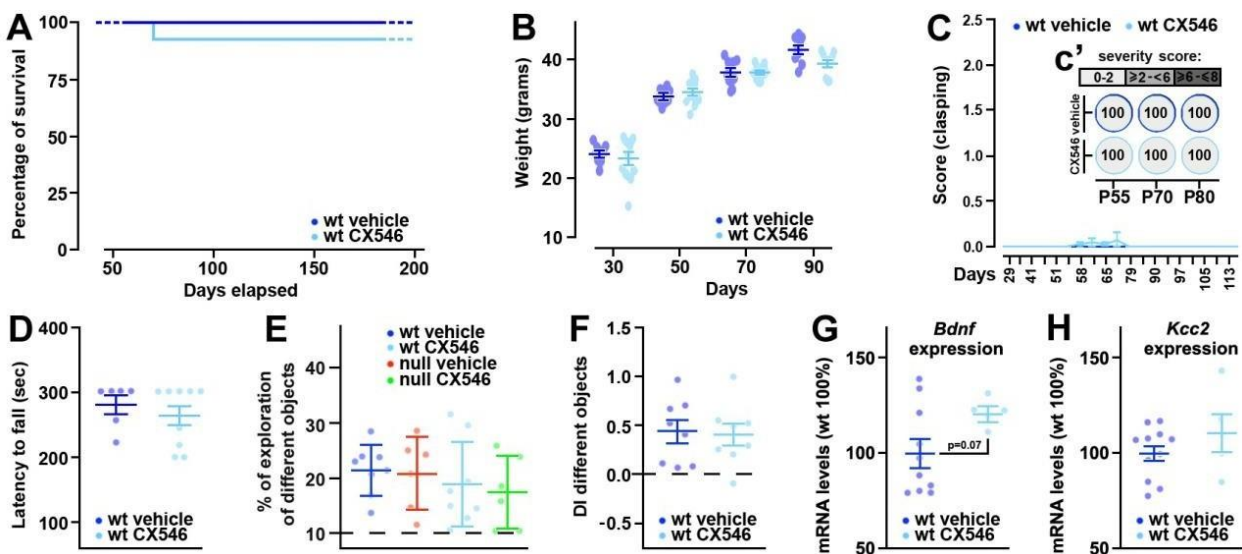

Supplement: EMMM-13-e12433-s005.pdf [file EMMM-13-e12433-s005.pdf]
